# Supplementary material for: Mapping Recombination Rate on the Autosomal Chromosomes Based on the Persistency of Linkage Disequilibrium Phase Among Autochthonous Beef Cattle Populations in Spain
Source: PubMed Central journal article supplement (PMC6880760; doi:10.3389/fgene.2019.01170), 2019-11-20

**Supplementary Table 1.** False discovery rate (FDR) for the top 10 enriched GO terms for Biological processes with the *Bos taurus* database for genes within the genomic regions located over the 95<sup>th</sup> (high recombination rate) and below the 5<sup>th</sup> (low recombination rate) percentiles of average recombination rates.

| High Recombination Rate                                        |          | Low Recombination Rate                                                               |          |
|----------------------------------------------------------------|----------|--------------------------------------------------------------------------------------|----------|
| GO TERM                                                        | FDR      | GO TERM                                                                              | FDR      |
| inorganic cation import across plasma membrane                 | 5.97e-01 | RNA splicing, via transesterification reactions                                      | 6.61e-01 |
| inorganic ion import across plasma membrane                    | 5.97e-01 | RNA splicing, via transesterification reactions with bulged adenosine as nucleophile | 6.61e-01 |
| regulation of cellular macromolecule biosynthetic process      | 7.15e-01 | mRNA splicing, via spliceosome                                                       | 6.61e-01 |
| regulation of RNA metabolic process                            | 7.15e-01 | DNA replication initiation                                                           | 1.00e-00 |
| regulation of gene expression                                  | 7.15e-01 | mRNA processing                                                                      | 1.00e-00 |
| import across plasma membrane                                  | 7.15e-01 | cellular response to ketone                                                          | 1.00e-00 |
| regulation of cellular biosynthetic                            | 7.15e-01 | cell part morphogenesis                                                              | 1.00e-00 |
| regulation of biosynthetic process                             | 7.15e-01 | locomotory behavior                                                                  | 1.00e-00 |
| regulation of macromolecule biosynthetic process               | 7.15e-01 | plasma membrane bounded cell projection morphogenesis                                | 1.00e-00 |
| Regulation of nucleobase-containing compound metabolic process | 7.15e-01 | cell morphogenesis involved in neuron differentiation                                | 1.00e-00 |

**Supplementary Table 2.** False discovery rate (FDR) for the top 10 enriched GO terms for Cellular Components with the *Bos taurus* database for genes within the genomic regions located over the 95<sup>th</sup> (high recombination rate) and below the 5<sup>th</sup> (low recombination rate) percentiles of the average recombination rates.

| High Recombination rate        |          | Low Recombination rate                                  |          |
|--------------------------------|----------|---------------------------------------------------------|----------|
| GO TERM                        | FDR      | GO TERM                                                 | FDR      |
| phagocytic vesicle             | 5.24e-02 | cytosol                                                 | 6.79e-04 |
| cytosol                        | 3.37e-01 | nuclear lumen                                           | 1.03e-04 |
| glutamatergic synapse          | 4.51e-01 | nucleoplasm                                             | 1.04e-01 |
| endocytic vesicle              | 4.51e-01 | endoplasmic reticulum                                   | 1.04e-01 |
| transcription factor complex   | 4.51e-01 | intrinsic component of external side of plasma membrane | 1.68e-01 |
| anchored component of membrane | 4.51e-01 | anchored component of external size of plasma membrane  | 1.68e-01 |
| tethering complex              | 4.51e-01 | golgi apparatus                                         | 1.94e-01 |
| cytoplasmic dynein complex     | 6.11e-01 | ubiquitin ligase complex                                | 3.56e-01 |
| nucleoplasm                    | 6.11e-01 | cullin-RING ubiquitin ligase complex                    | 3.56e-01 |
| nuclear lumen                  | 6.11e-01 | Sm-like protein family complex                          | 4.11e-01 |

**Supplementary Table 3.** False discovery rate (FDR) for the top 10 enriched GO terms for Molecular Functions for genes with the *Bos Taurus* database within the genomic regions located over the 95<sup>th</sup> (high recombination rate) and below the 5<sup>th</sup> (low recombination rate) percentiles of the average recombination rates.

| High Recombination Rate                                                                   |          | Low Recombination Rate                         |          |
|-------------------------------------------------------------------------------------------|----------|------------------------------------------------|----------|
| GO TERM                                                                                   | FDR      | GO TERM                                        | FDR      |
| hydrolase activity, acting on carbon-nitrogen (but not peptide) bonds, in linear amidines | 3.22e-01 | GTP-dependent protein binding                  | 2.7e-02  |
| cation: cation antiporter activity                                                        | 1.00e-00 | mRNA binding                                   | 3.78e-01 |
| solute: cation antiporter activity                                                        | 1.00e-00 | 5S rRNA binding                                | 9.49e-01 |
| calmodulin binding                                                                        | 1.00e-00 | aminoacyl-tRNA ligase activity                 | 1.00e-00 |
| RNA polymerase II activating transcription factor binding                                 | 1.00e-00 | ligase activity, forming carbon-oxygen bonds   | 1.00e-00 |
| phosphatidylinositol 3-kinase regulatory subunit binding                                  | 1.00e-00 | DNA replication origin binding                 | 1.00e-00 |
| lysine-acetylated histone binding                                                         | 1.00e-00 | carbonate dehydratase activity                 | 1.00e-00 |
| acetylation-dependent protein binding                                                     | 1.00e-00 | RNA binding                                    | 1.00e-00 |
| voltage-gated potassium channel activity                                                  | 1.00e-00 | metallochaperone activity                      | 1.00e-00 |
| mRNA binding                                                                              | 1.00e-00 | sialic acid transmembrane transporter activity | 1.00e-00 |

**Supplementary Figure 1.** *Persistency of Linkage Disequilibrium (LD) measured as the log-correlation between estimates of LD between populations of Asturiana de los Valles – AV- and Avileña Negra-Ibérica -ANI- and estimates of the slope of the regression with respect to the genomic distance for different ranges [0-1 Mb – black, 0-500 Kb-green, 0-250 Kb- red and 0-100 Kb-blue].*

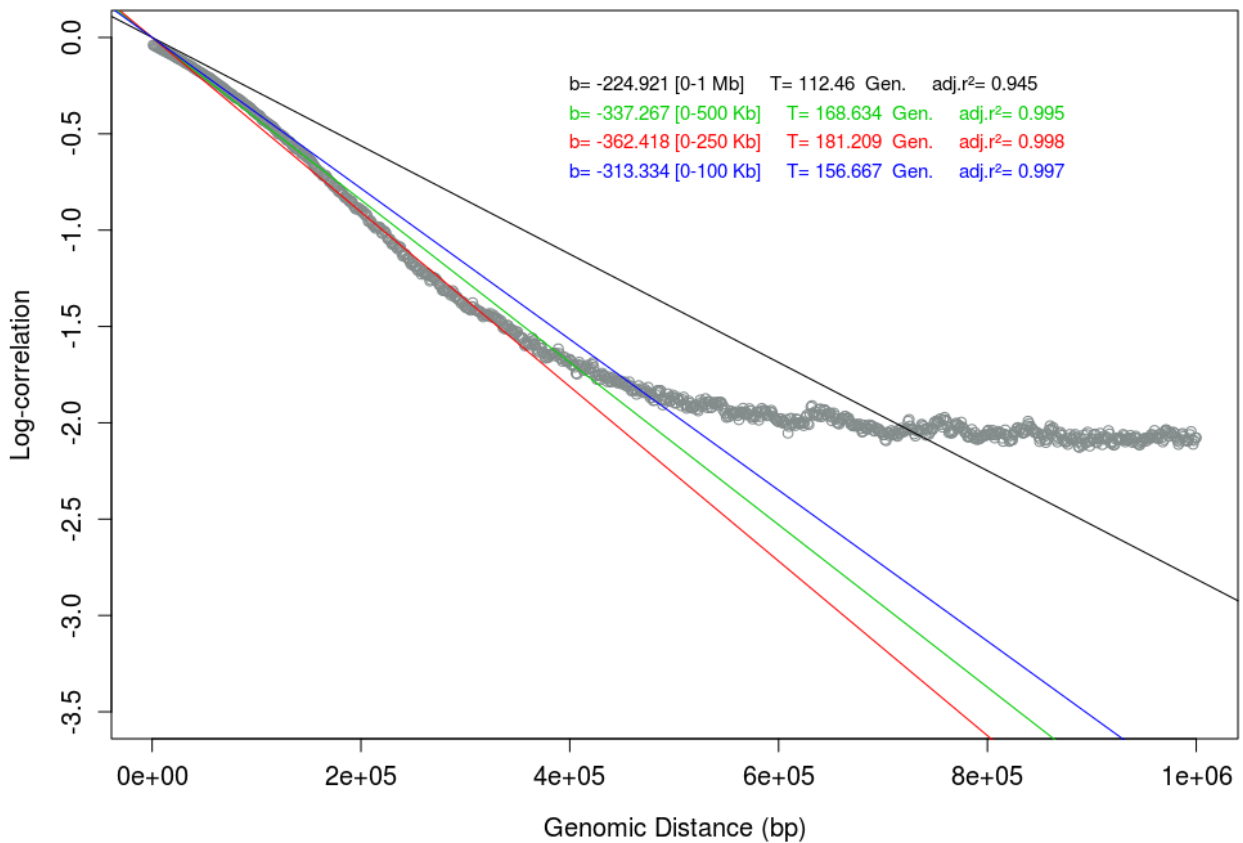

**Supplementary Figure 2.** *Persistency of Linkage Disequilibrium (LD) measured as the log-correlation between estimates of LD between populations of Asturiana de los Valles – AV- and Bruna dels Pirineus -BP- and estimates of the slope of the regression with respect to the genomic distance for different ranges [0-1 Mb – black, 0-500 Kb-green, 0-250 Kb- red and 0-100 Kb-blue].*

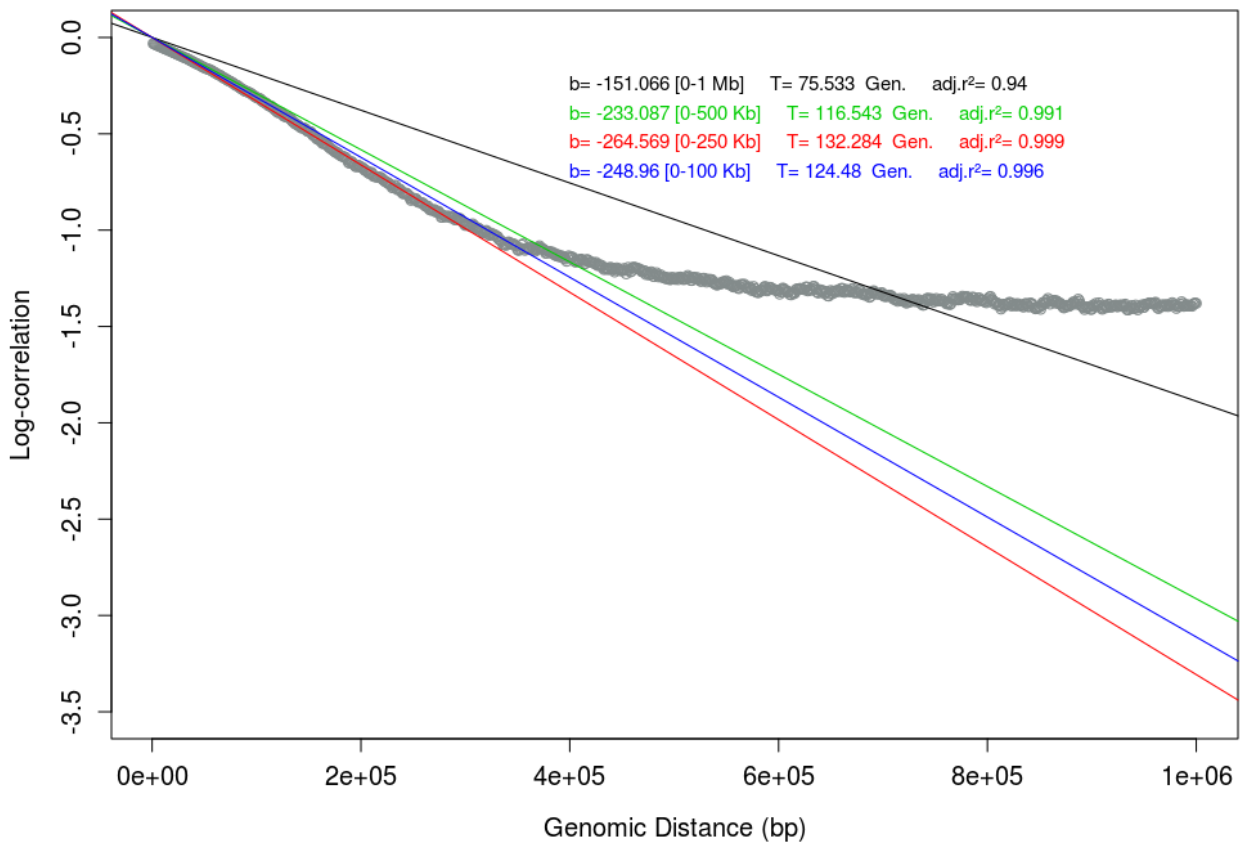

**Supplementary Figure 3.** *Persistency of Linkage Disequilibrium (LD) measured as the log-correlation between estimates of LD between populations of Asturiana de los Valles – AV- and Morucha -Mo- and estimates of the slope of the regression with respect to the genomic distance for different ranges [0-1 Mb – black, 0-500 Kb-green, 0-250 Kb- red and 0-100 Kb-blue].*

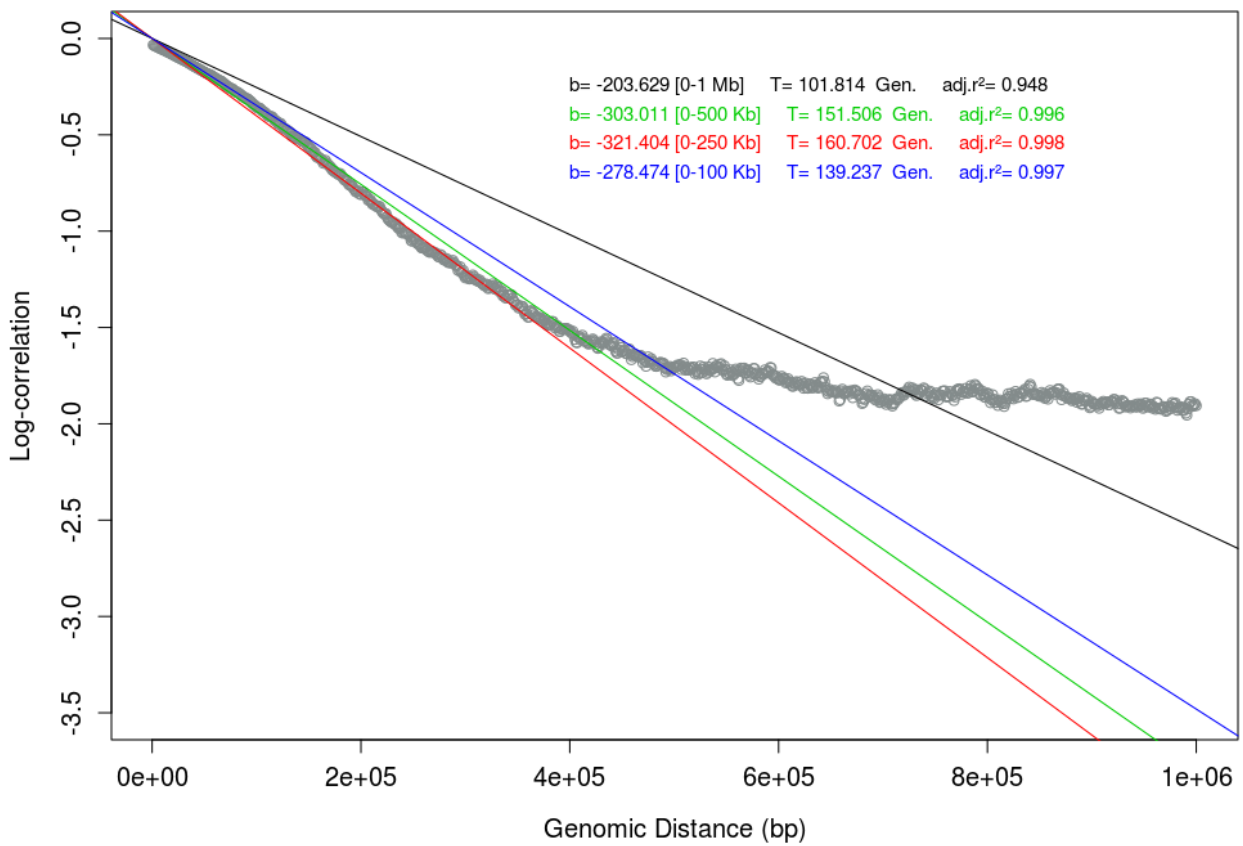

**Supplementary Figure 4.** *Persistency of Linkage Disequilibrium (LD) measured as the log-correlation between estimates of LD between populations of Asturiana de los Valles – AV- and Pirenaica -Pi- and estimates of the slope of the regression with respect to the genomic distance for different ranges [0-1 Mb – black, 0-500 Kb-green, 0-250 Kb- red and 0-100 Kb-blue].*

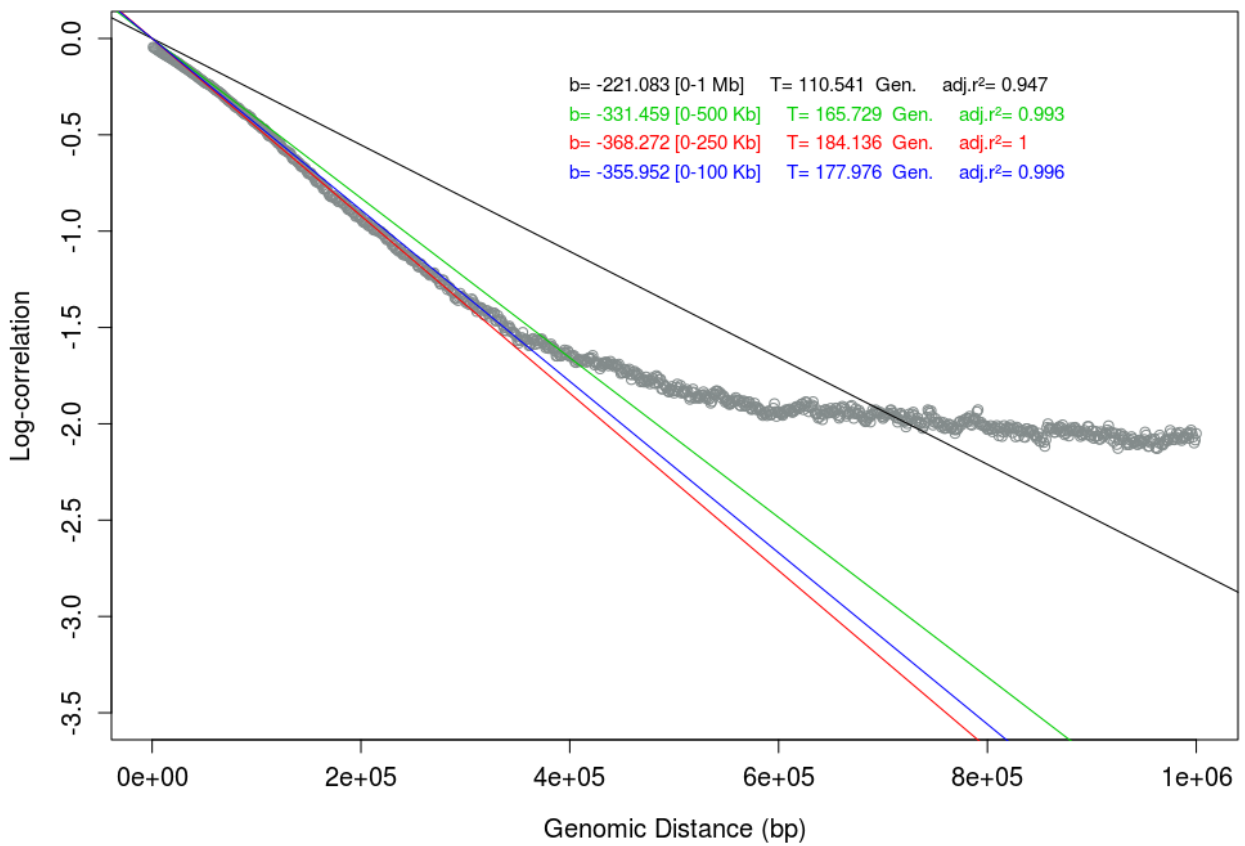

**Supplementary Figure 5.** *Persistency of Linkage Disequilibrium (LD) measured as the log-correlation between estimates of LD between populations of Asturiana de los Valles – AV- and Retinta -Re- and estimates of the slope of the regression with respect to the genomic distance for different ranges [0-1 Mb – black, 0-500 Kb- green, 0-250 Kb- red and 0-100 Kb-blue].*

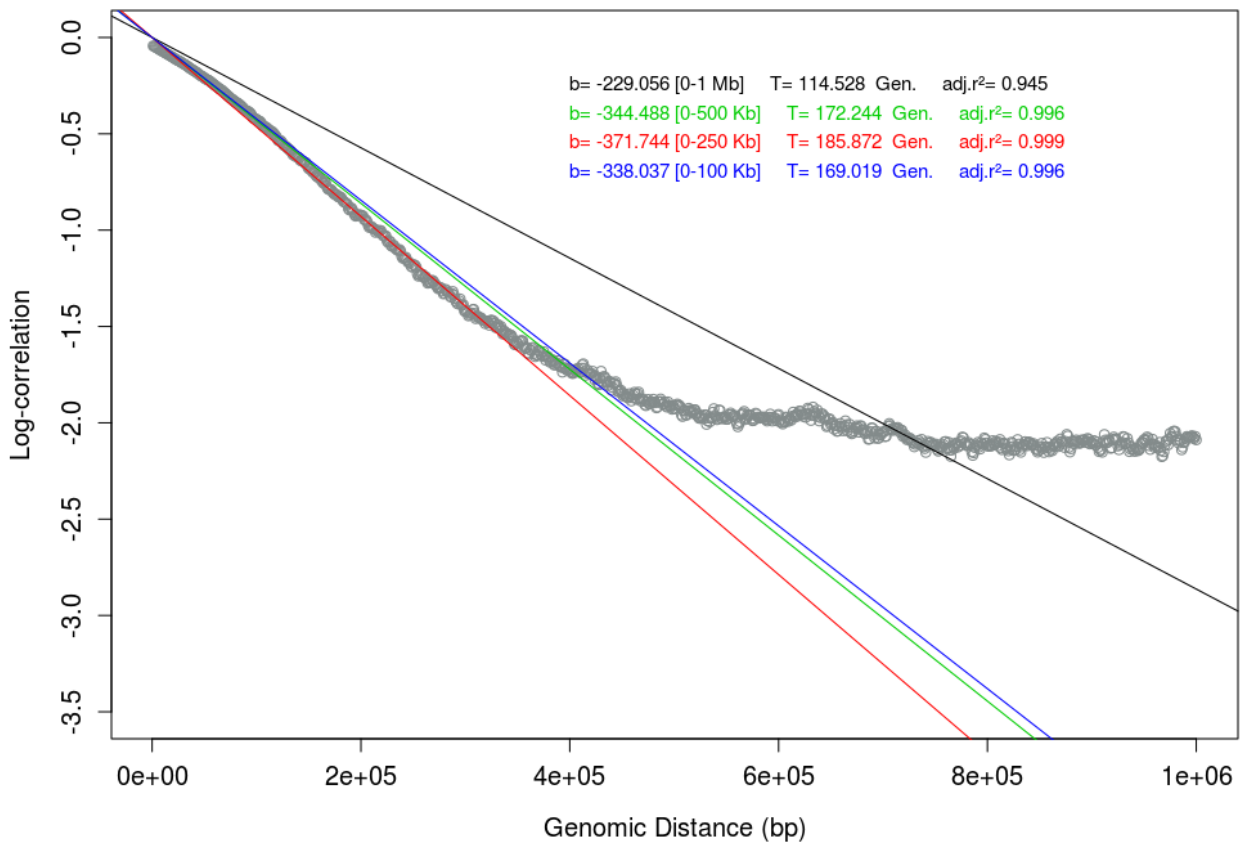



**Supplementary Figure 6.** *Persistency of Linkage Disequilibrium (LD) measured as the log-correlation between estimates of LD between populations of Asturiana de los Valles – AV- and Rubia Gallega -RG- and estimates of the slope of the regression with respect to the genomic distance for different ranges [0-1 Mb – black, 0-500 Kb-green, 0-250 Kb- red and 0-100 Kb-blue].*

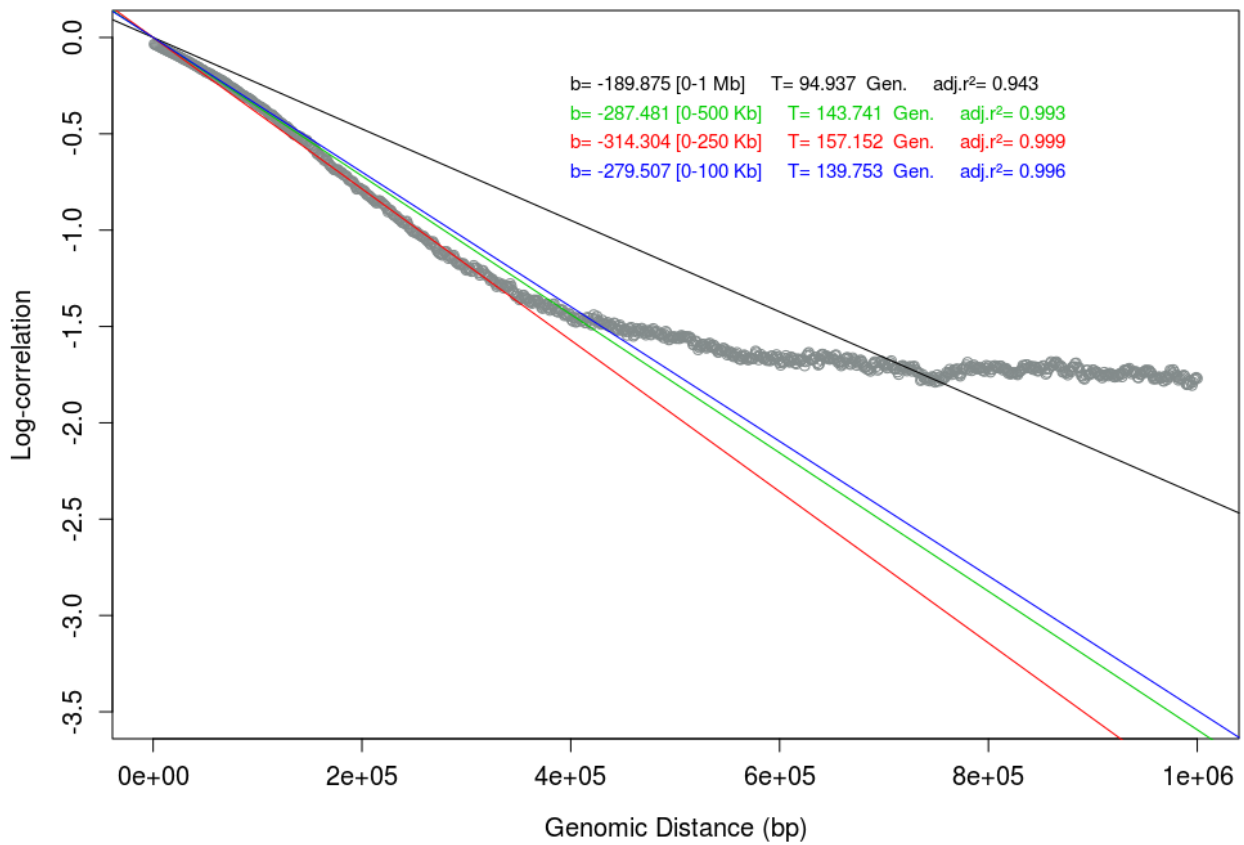

**Supplementary Figure 7.** *Persistency of Linkage Disequilibrium (LD) measured as the log-correlation between estimates of LD between populations of Avileña Negra-Ibérica -ANI- and Bruna dels Pirineus -BP- and estimates of the slope of the regression with respect to the genomic distance for different ranges [0-1 Mb – black, 0-500 Kb-green, 0-250 Kb- red and 0-100 Kb-blue].*

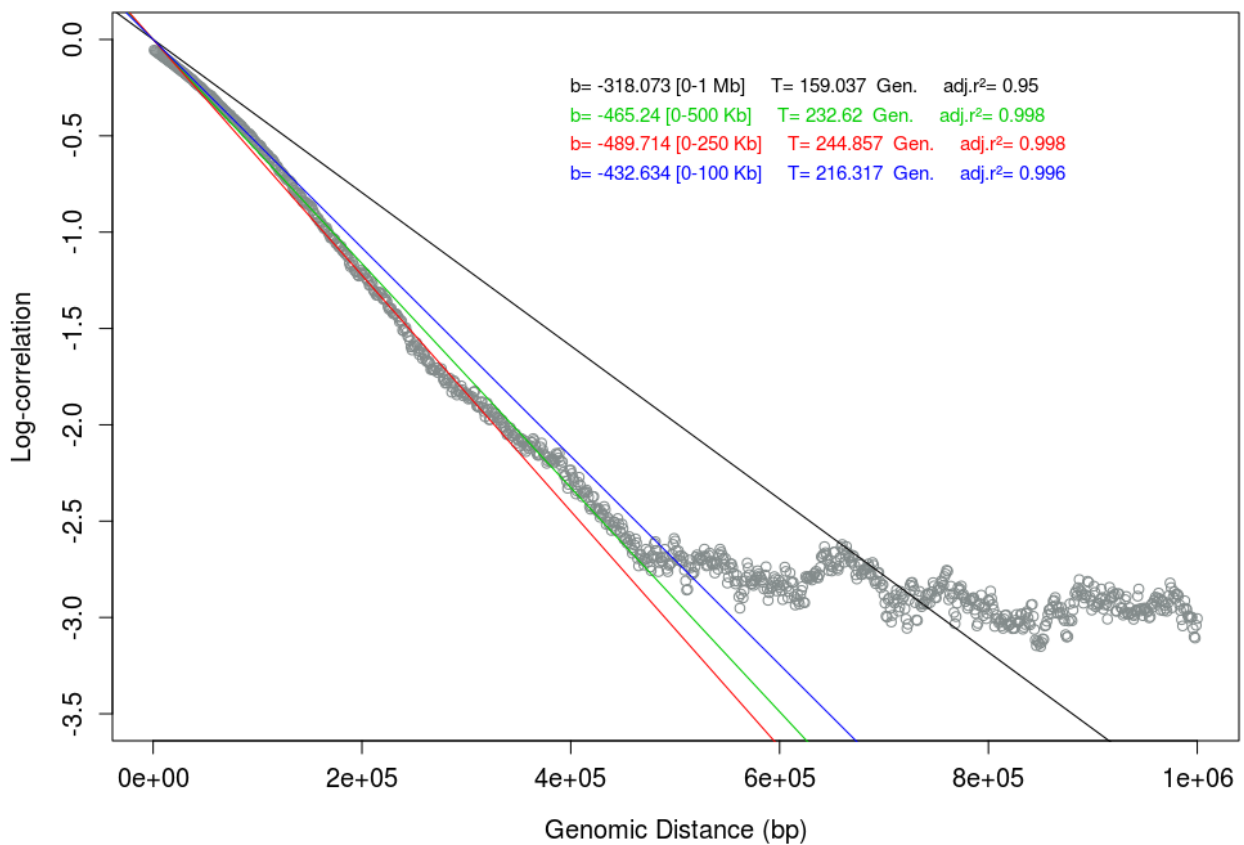

**Supplementary Figure 8.** *Persistency of Linkage Disequilibrium (LD) measured as the log-correlation between estimates of LD between populations of Avileña Negra-Ibérica -ANI- and Morucha -Mo- and estimates of the slope of the regression with respect to the genomic distance for different ranges [0-1 Mb – black, 0-500 Kb-green, 0-250 Kb- red and 0-100 Kb-blue].*

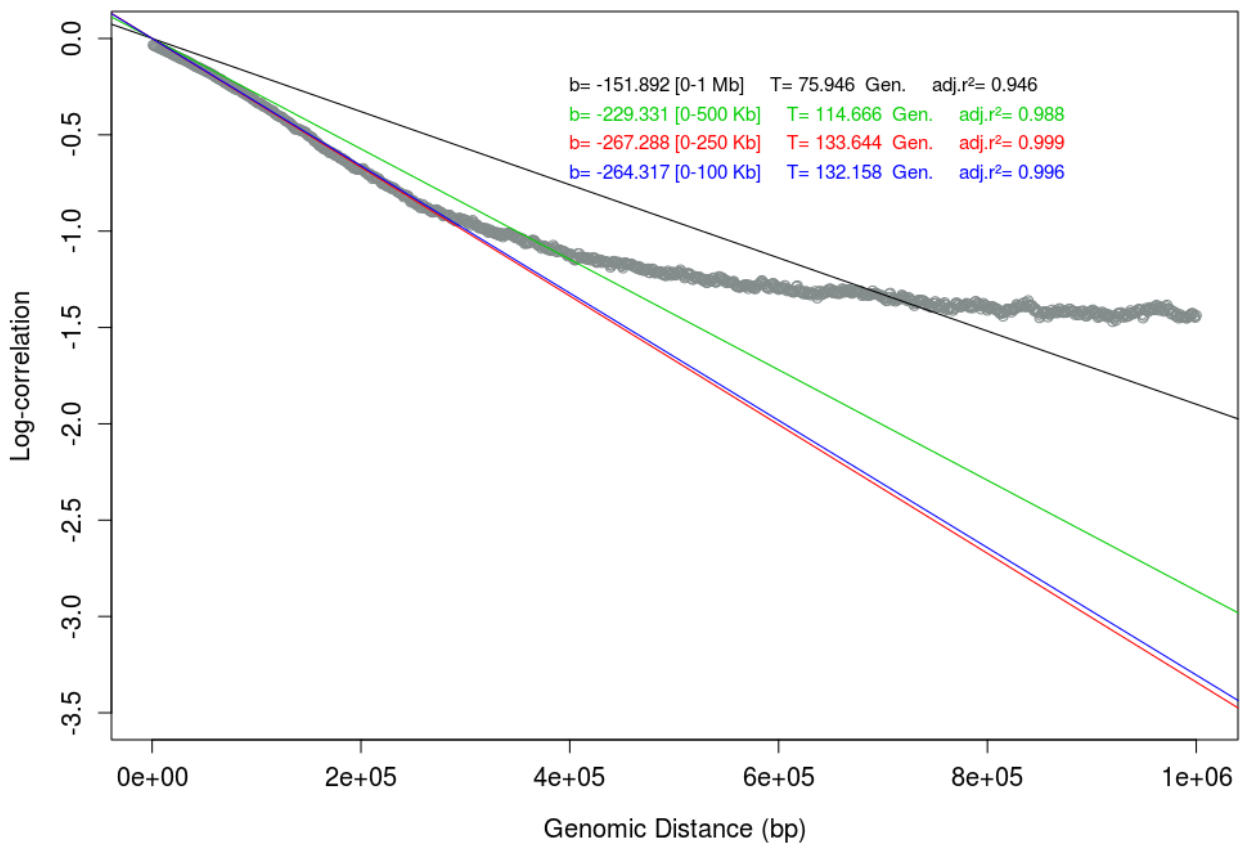

**Supplementary Figure 9.** *Persistency of Linkage Disequilibrium (LD) measured as the log-correlation between estimates of LD between populations of Avileña Negra-Ibérica -ANI- and Pirenaica -Pi- and estimates of the slope of the regression with respect to the genomic distance for different ranges [0-1 Mb – black, 0-500 Kb-green, 0-250 Kb- red and 0-100 Kb-blue].*

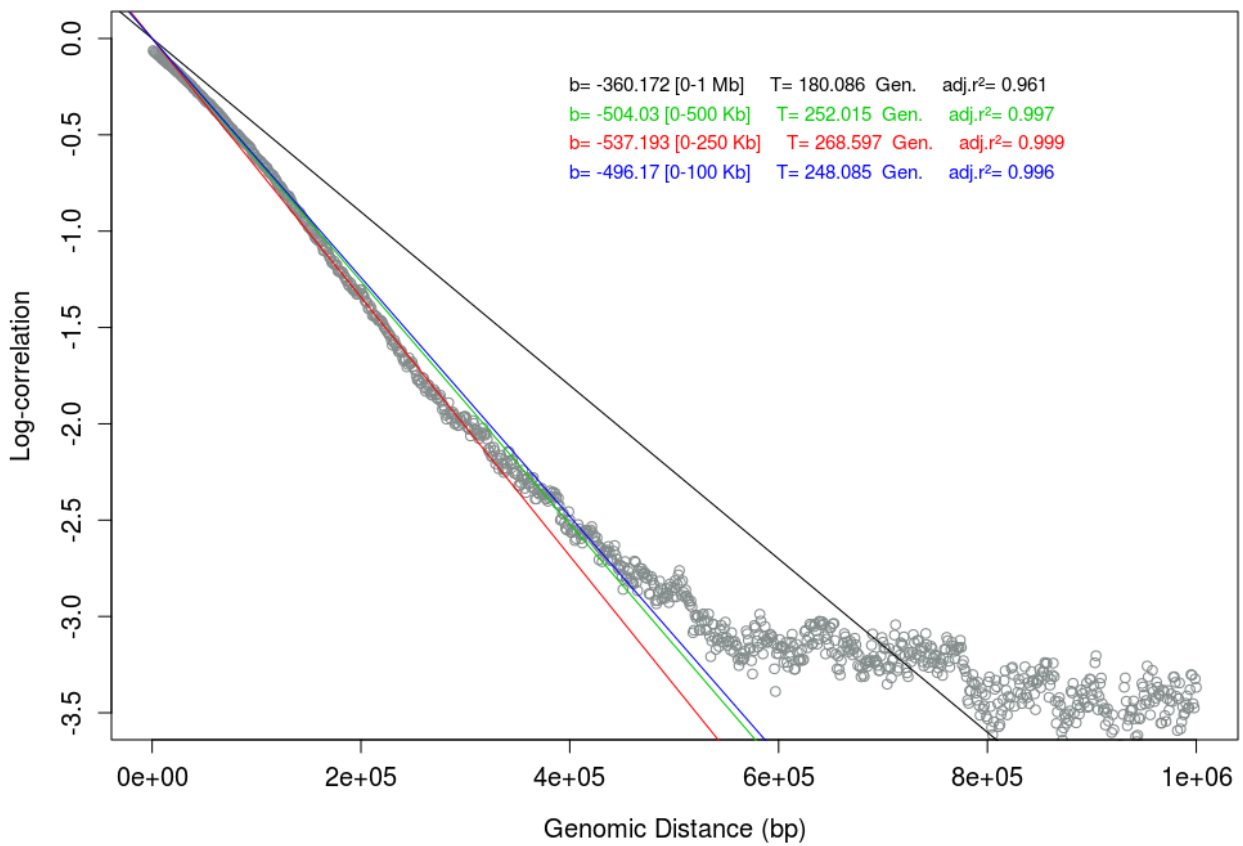

**Supplementary Figure 10.** *Persistency of Linkage Disequilibrium (LD) measured as the log-correlation between estimates of LD between populations of Avileña Negra-Ibérica -ANI- and Retinta -Re- and estimates of the slope of the regression with respect to the genomic distance for different ranges [0-1 Mb – black, 0-500 Kb-green, 0-250 Kb- red and 0-100 Kb-blue].*

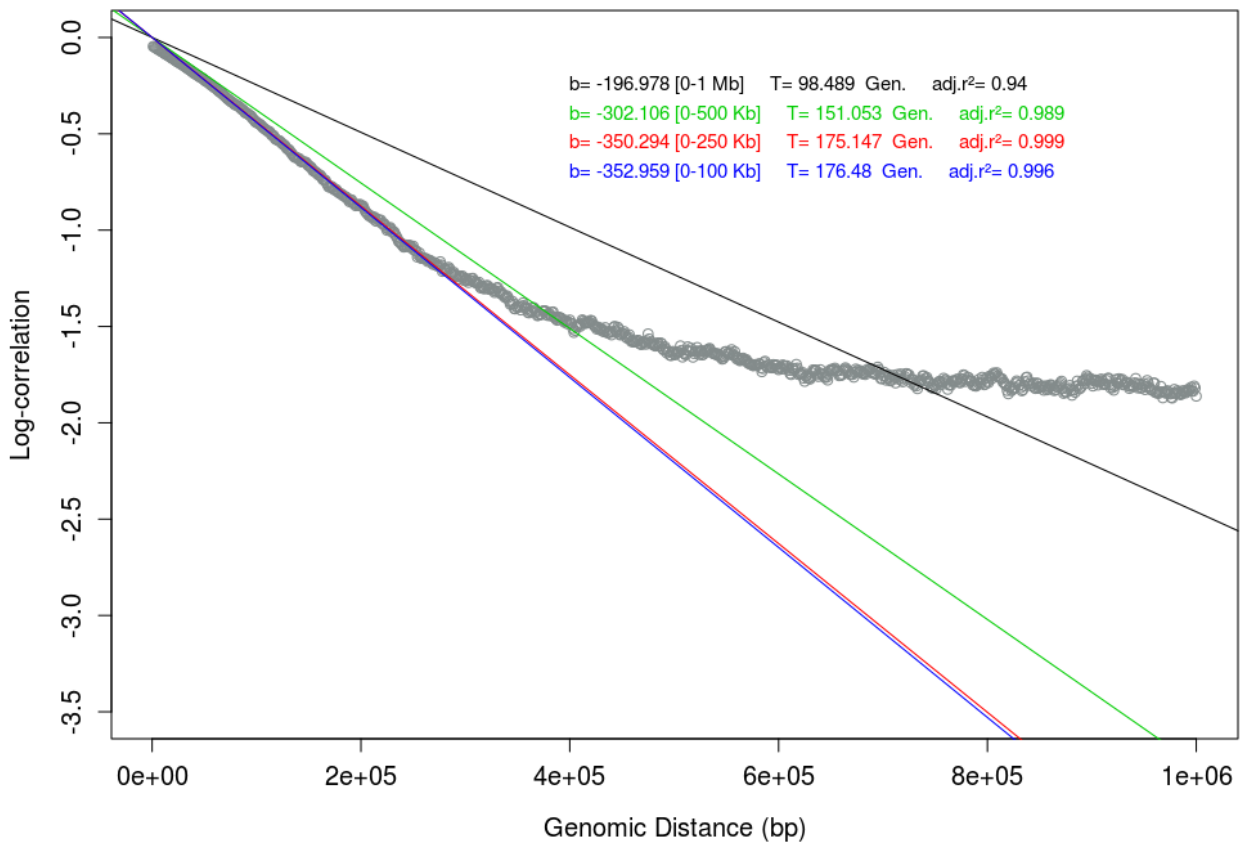

**Supplementary Figure 11.** *Persistency of Linkage Disequilibrium (LD) measured as the log-correlation between estimates of LD between populations of Avileña Negra-Ibérica -ANI- and Rubia Gallega -RG- and estimates of the slope of the regression with respect to the genomic distance for different ranges [0-1 Mb – black, 0-500 Kb-green, 0-250 Kb- red and 0-100 Kb-blue].*

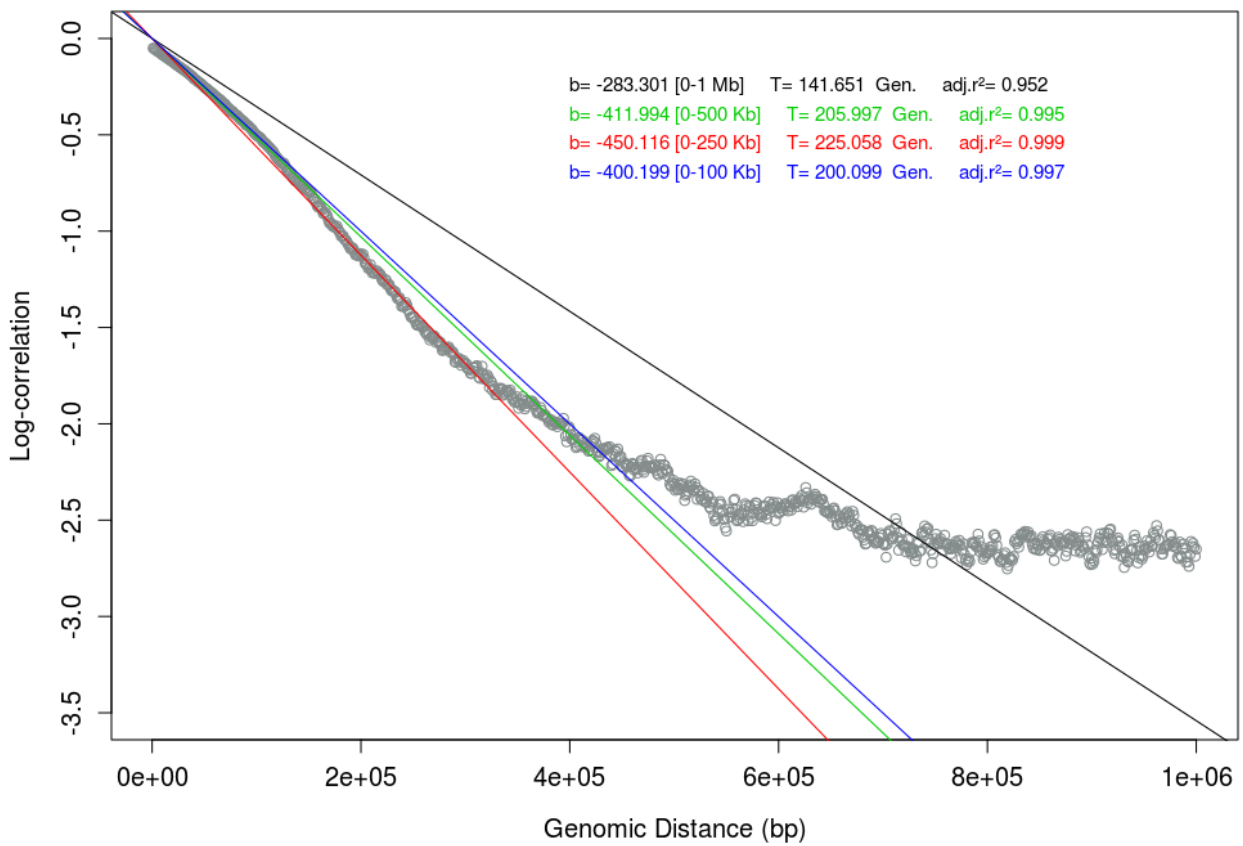

**Supplementary Figure 12.** *Persistency of Linkage Disequilibrium (LD) measured as the log-correlation between estimates of LD between populations of Bruna dels Pirineus -BP- and Morucha -Mo- and estimates of the slope of the regression with respect to the genomic distance for different ranges [0-1 Mb – black, 0-500 Kb- green, 0-250 Kb- red and 0-100 Kb-blue].*

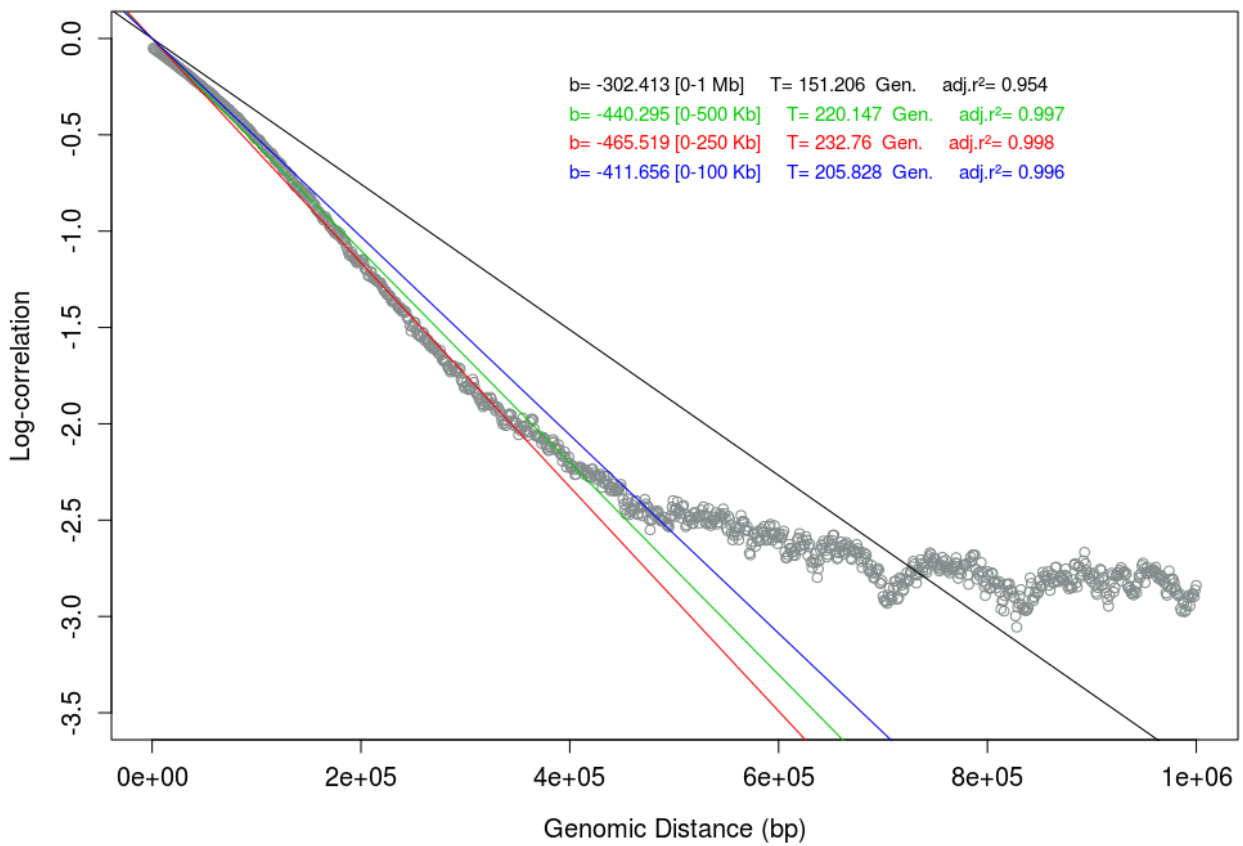

**Supplementary Figure 13.** *Persistency of Linkage Disequilibrium (LD) measured as the log-correlation between estimates of LD between populations of Bruna dels Pirineus -BP- and Pirenaica -Pi- and estimates of the slope of the regression with respect to the genomic distance for different ranges [0-1 Mb – black, 0-500 Kb- green, 0-250 Kb- red and 0-100 Kb-blue].*

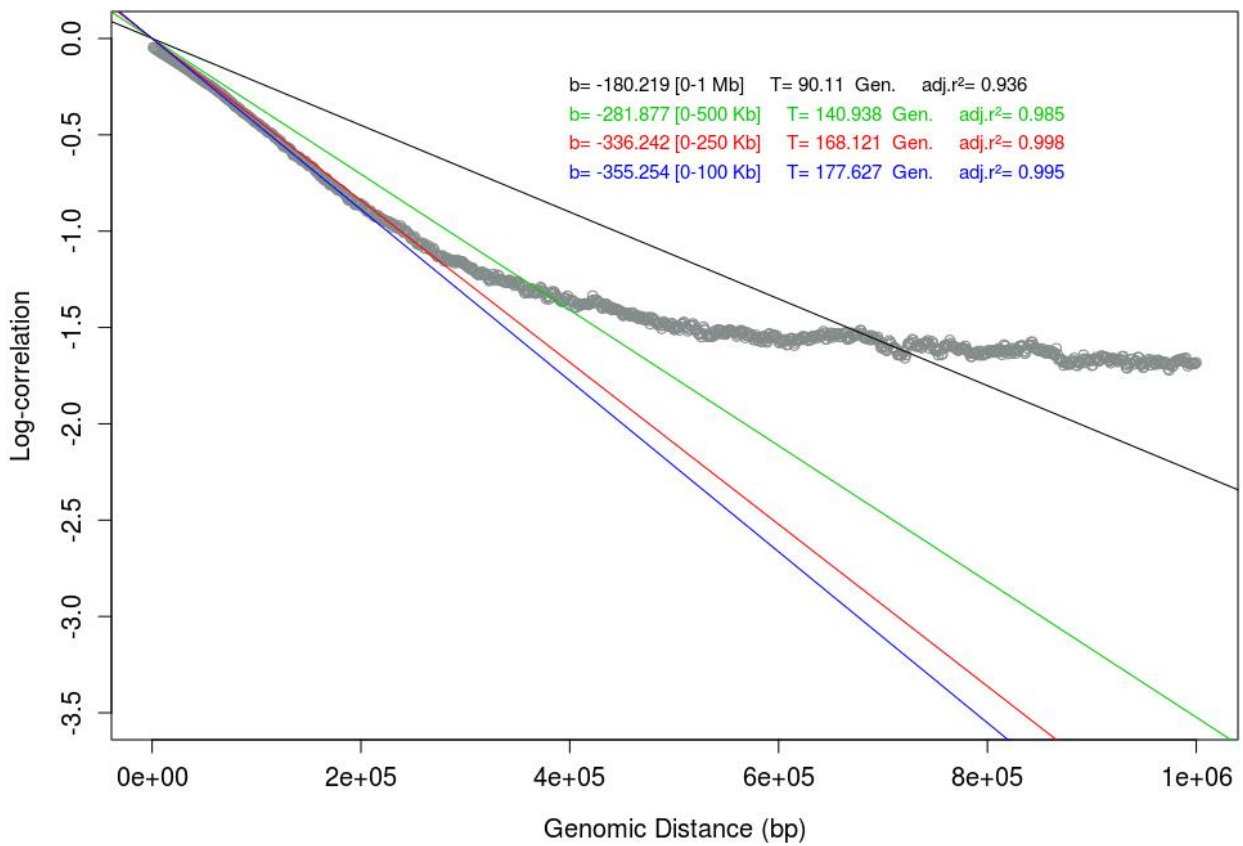



**Supplementary Figure 14.** *Persistency of Linkage Disequilibrium (LD) measured as the log-correlation between estimates of LD between populations of Bruna dels Pirineus -BP- and Retinta -Re- and estimates of the slope of the regression with respect to the genomic distance for different ranges [0-1 Mb – black, 0-500 Kb- green, 0-250 Kb- red and 0-100 Kb-blue].*

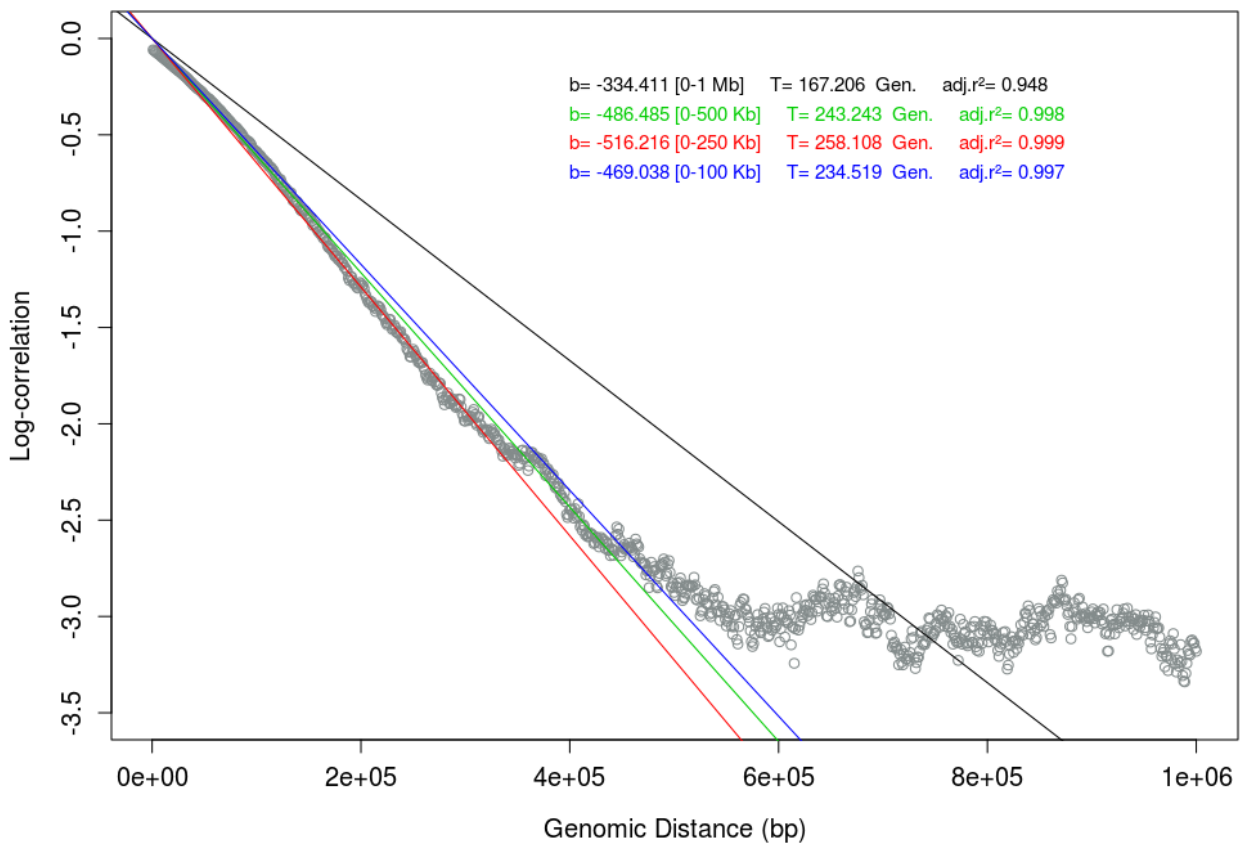

**Supplementary Figure 15.** *Persistency of Linkage Disequilibrium (LD) measured as the log-correlation between estimates of LD between populations of Bruna dels Pirineus -BP- and Rubia Gallega -RG- and estimates of the slope of the regression with respect to the genomic distance for different ranges [0-1 Mb – black, 0-500 Kb-green, 0-250 Kb- red and 0-100 Kb-blue].*

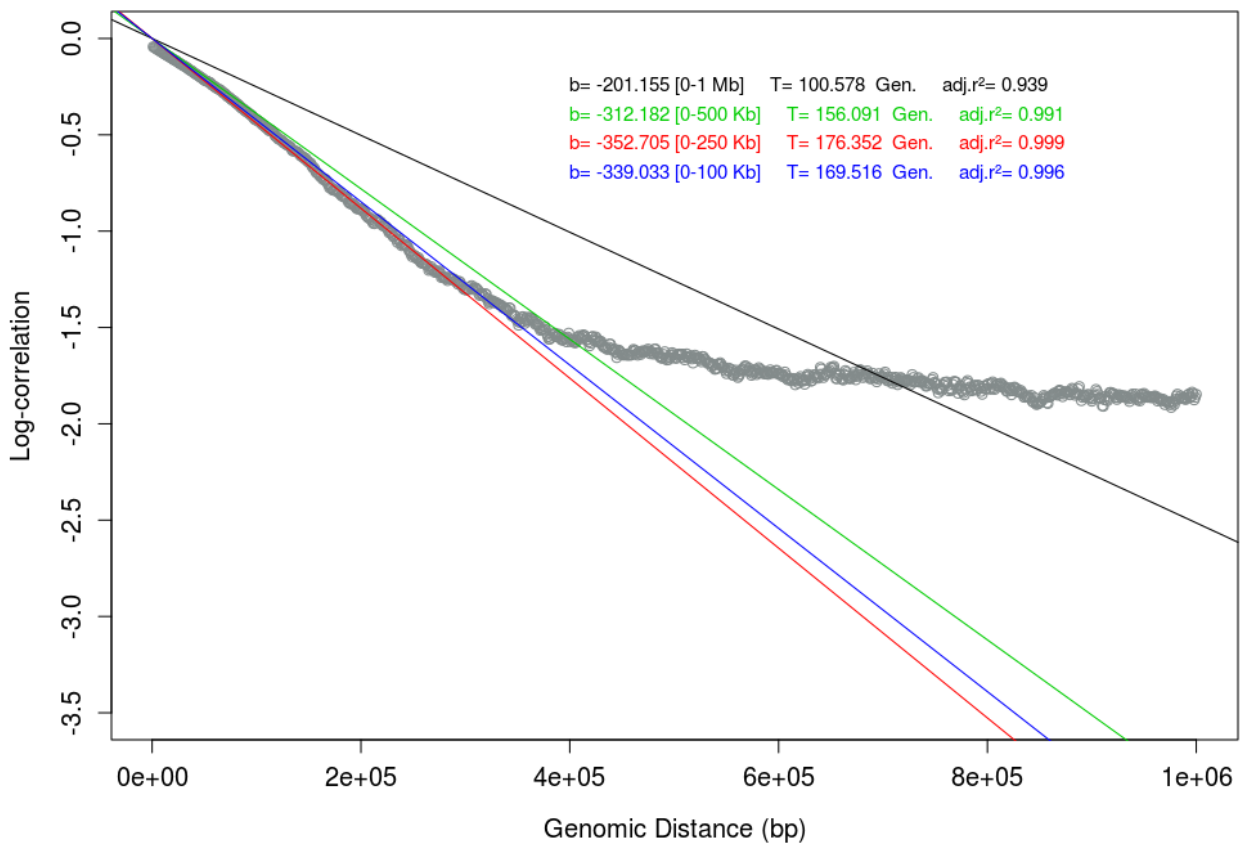

**Supplementary Figure 16.** *Persistency of Linkage Disequilibrium (LD) measured as the log-correlation between estimates of LD between populations of Morucha -Mo- and Pirenaica -Pi- and estimates of the slope of the regression with respect to the genomic distance for different ranges [0-1 Mb – black, 0-500 Kb-green, 0-250 Kb- red and 0-100 Kb-blue].*

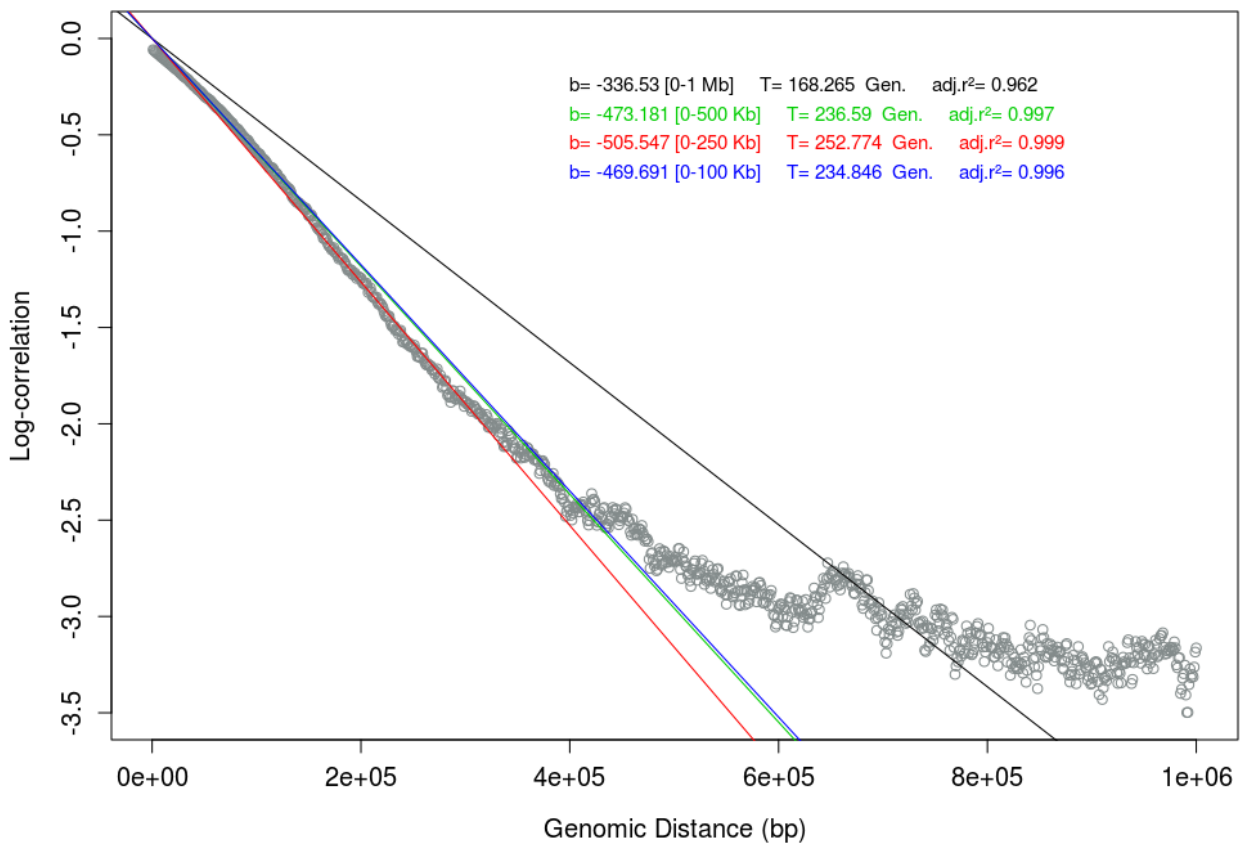

**Supplementary Figure 17.** *Persistency of Linkage Disequilibrium (LD) measured as the log-correlation between estimates of LD between populations of Morucha -Mo- and Retinta -Re- and estimates of the slope of the regression with respect to the genomic distance for different ranges [0-1 Mb – black, 0-500 Kb-green, 0-250 Kb- red and 0-100 Kb-blue].*

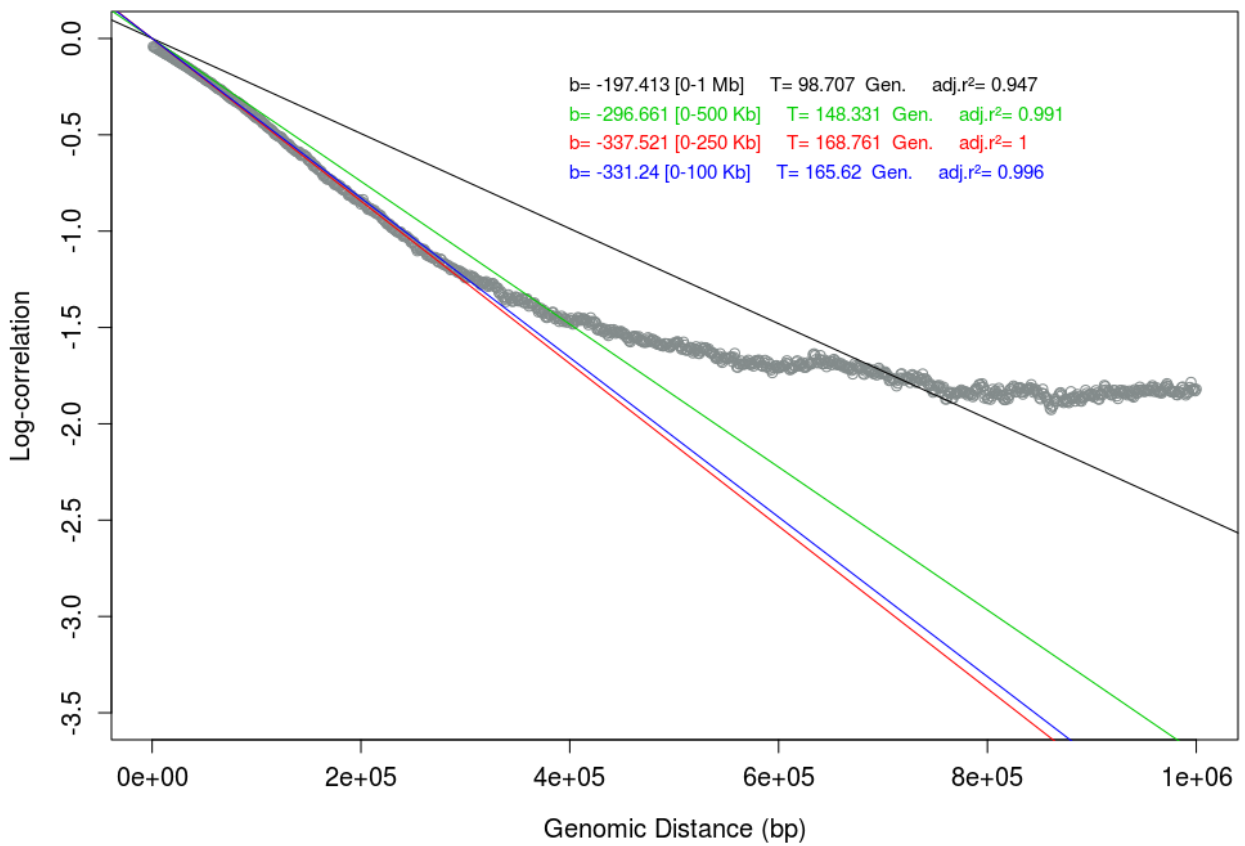

**Supplementary Figure 18.** *Persistency of Linkage Disequilibrium (LD) measured as the log-correlation between estimates of LD between populations of Morucha -Mo- and Rubia Gallega -RG- and estimates of the slope of the regression with respect to the genomic distance for different ranges [0-1 Mb – black, 0-500 Kb- green, 0-250 Kb- red and 0-100 Kb-blue].*

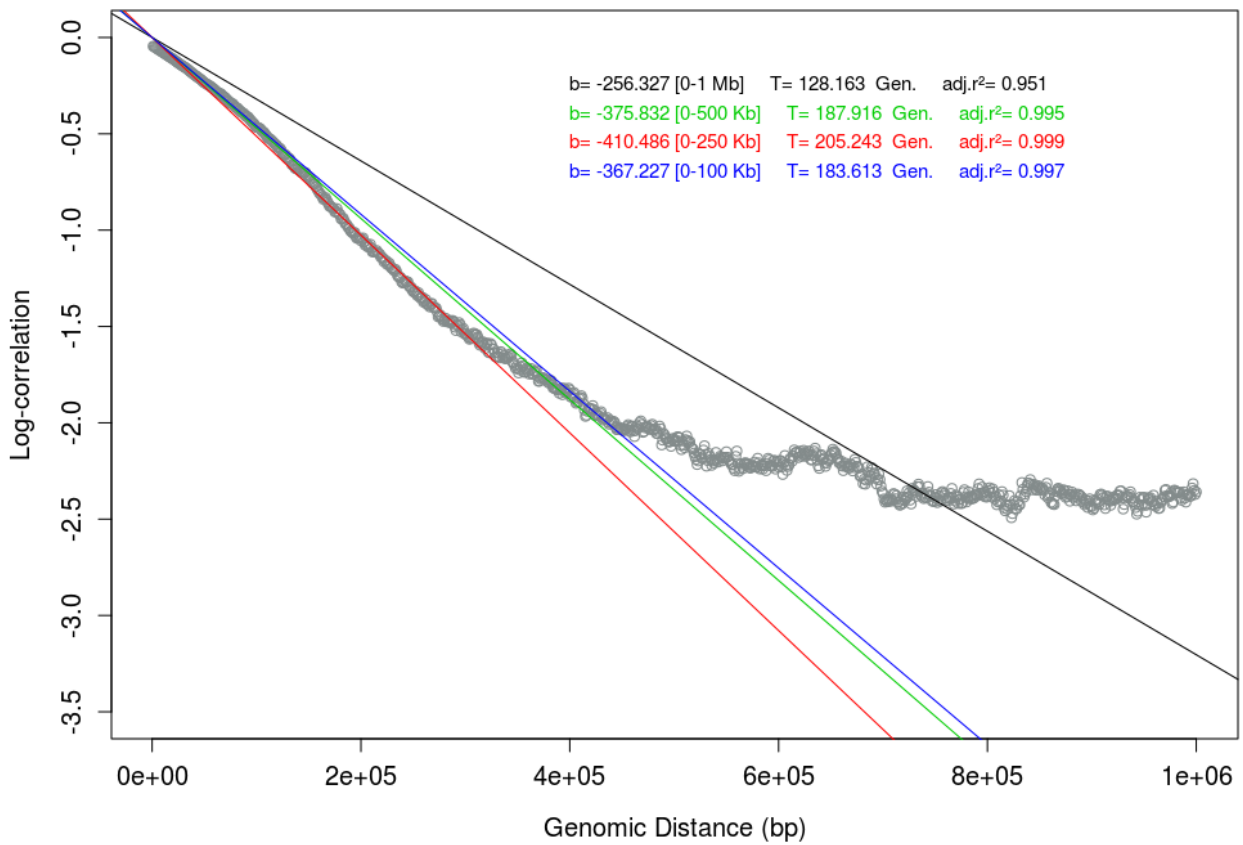

**Supplementary Figure 19.** Persistency of Linkage Disequilibrium (LD) measured as the log-correlation between estimates of LD between populations of *Pirenaica* -Pi- and *Retinta* -Re- and estimates of the slope of the regression with respect to the genomic distance for different ranges [0-1 Mb – black, 0-500 Kb-green, 0-250 Kb- red and 0-100 Kb-blue].

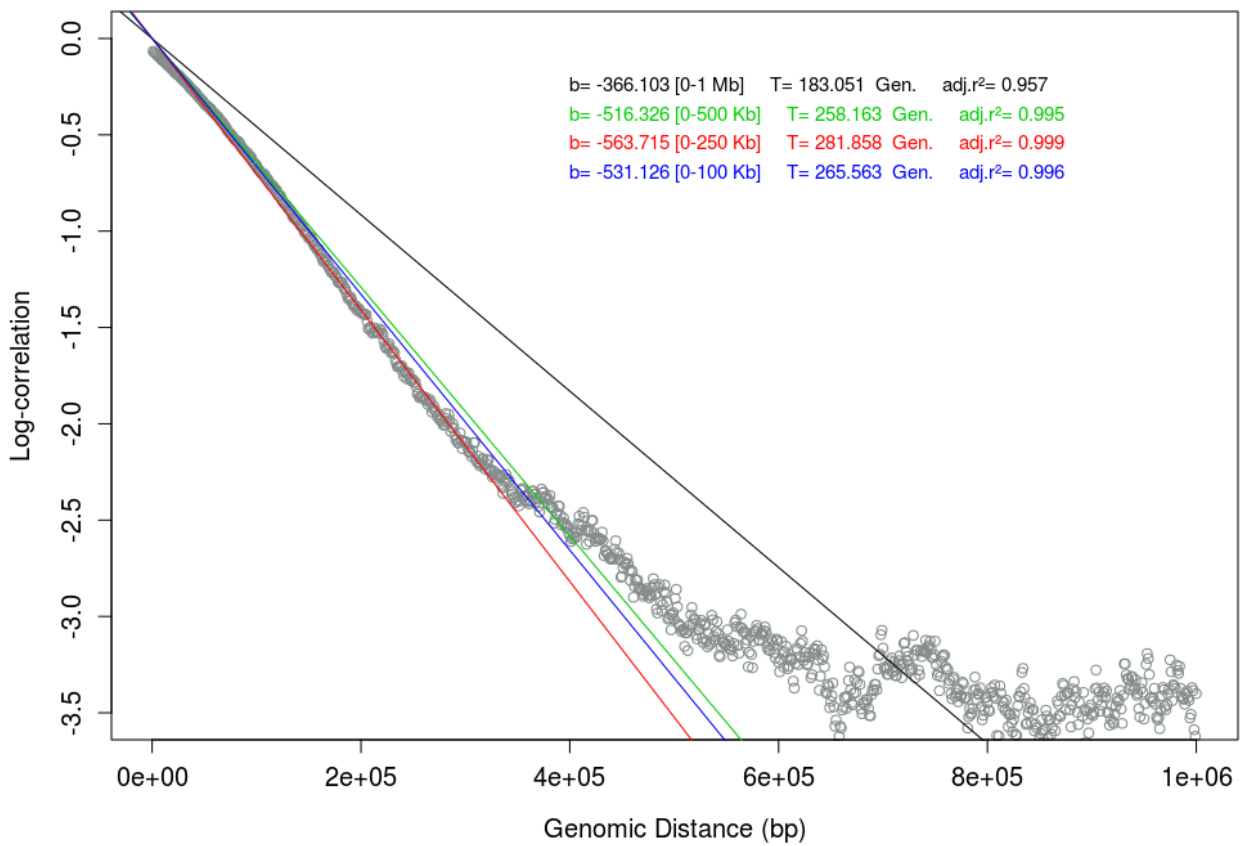

**Supplementary Figure 20.** *Persistency of Linkage Disequilibrium (LD) measured as the log-correlation between estimates of LD between populations of Rubia Gallega -RG- and Retinta -Re- and estimates of the slope of the regression with respect to the genomic distance for different ranges [0-1 Mb – black, 0-500 Kb- green, 0-250 Kb- red and 0-100 Kb-blue].*

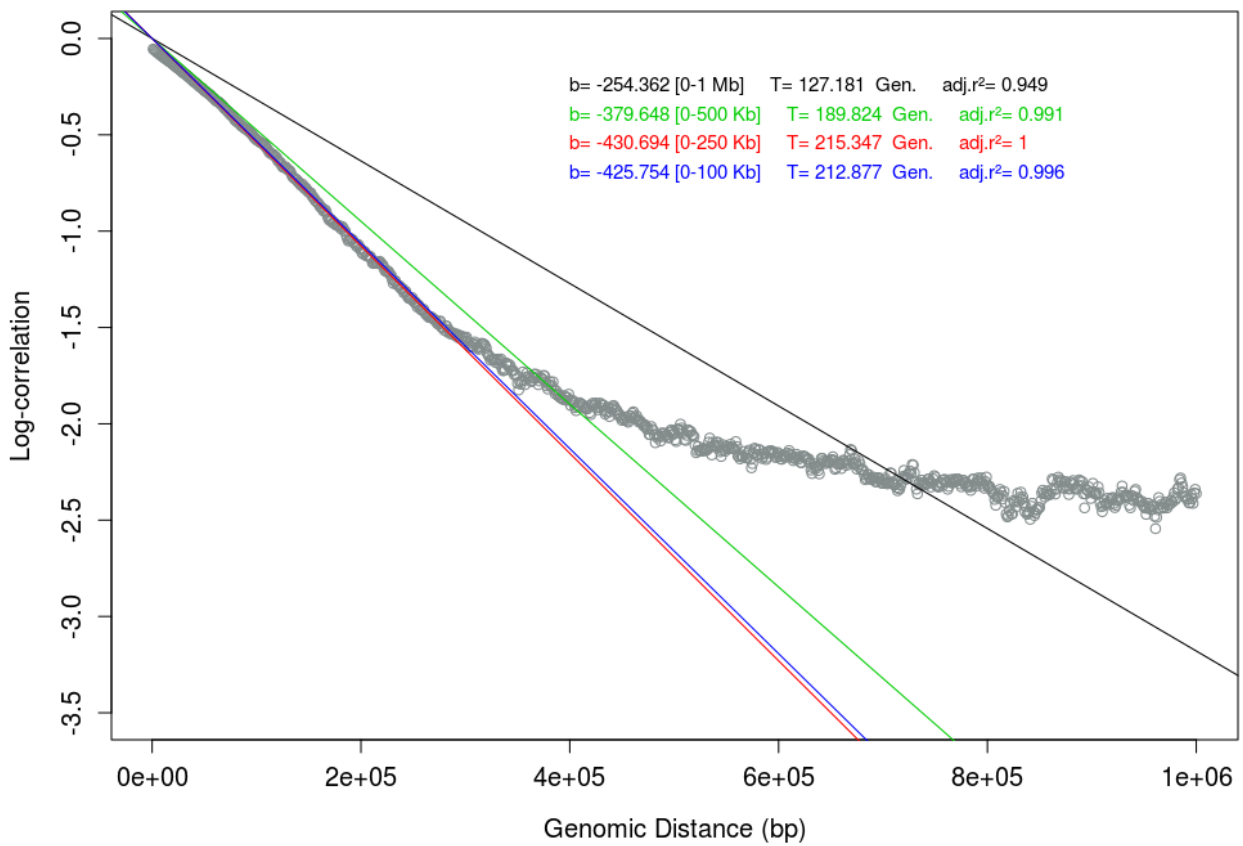

**Supplementary Figure 21.** *Estimates of the recombination rate (c) in bins of 1 Mb between Asturiana de los Valles -AV- and Avileña Negra-Ibérica -ANI- throughout the autosomal genome.*

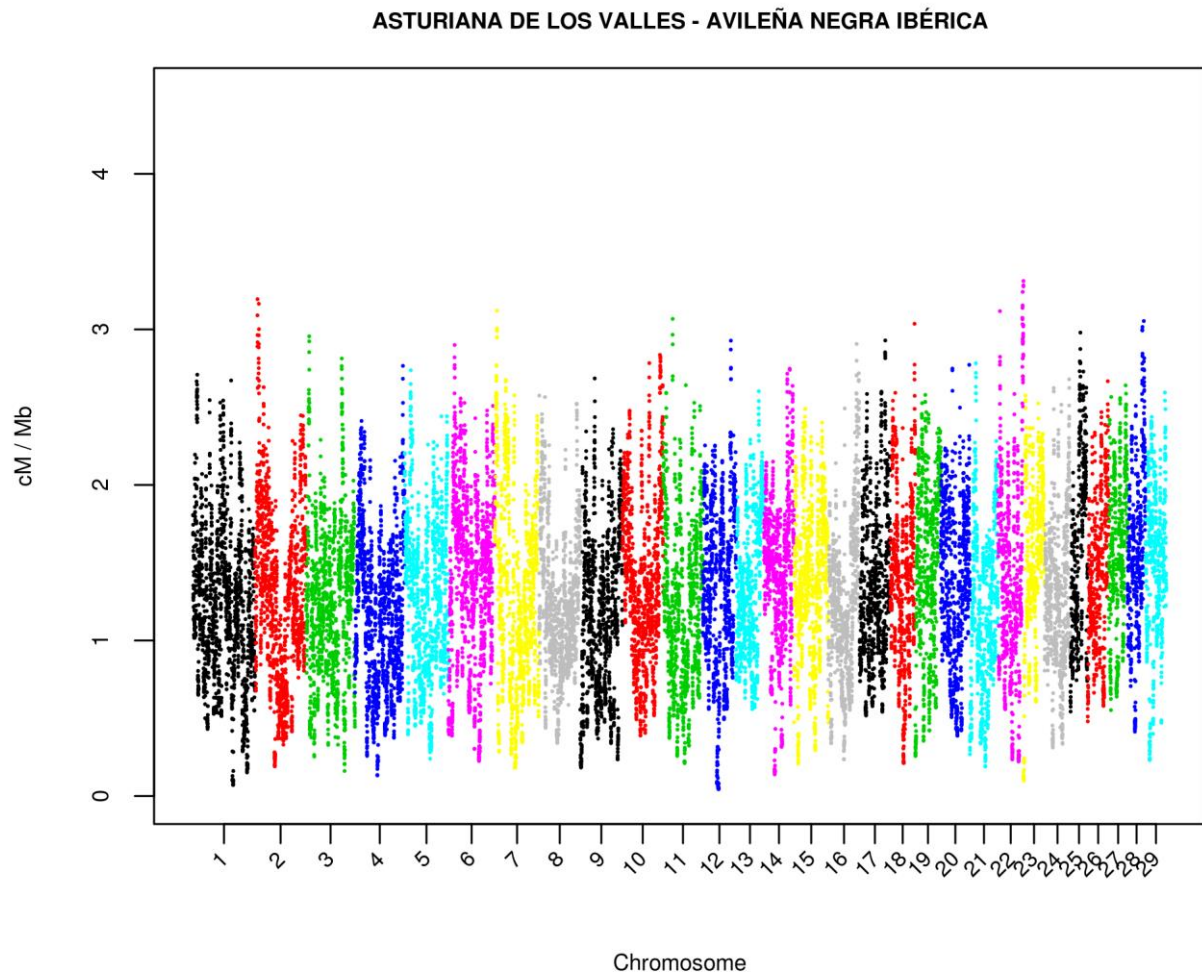



**Supplementary Figure 22.** Estimates of the recombination rate ( $c$ ) in bins of 1 Mb between *Asturiana de los Valles* -AV- and *Avileña Negra-Ibérica* -ANI- throughout the autosomal genome.

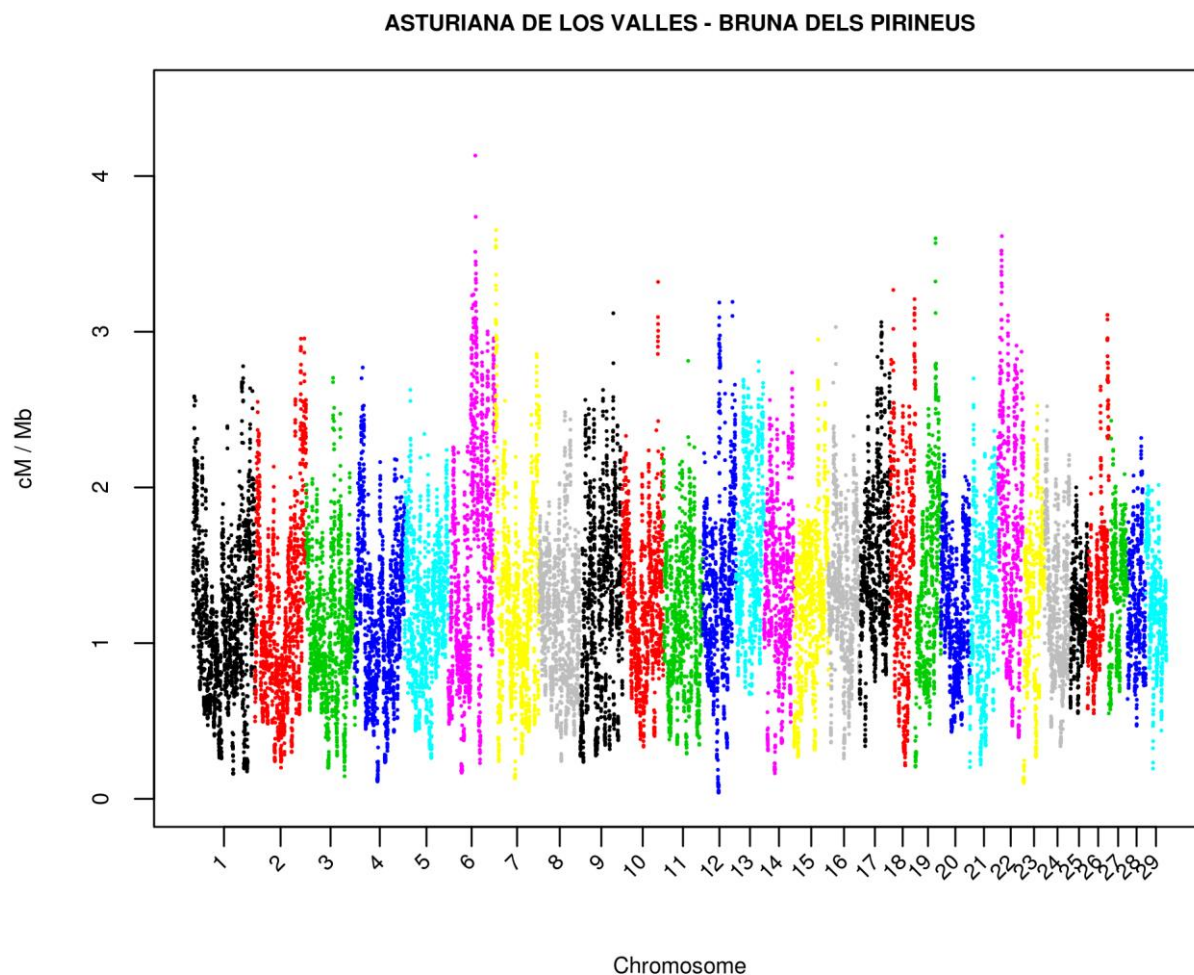

**Supplementary Figure 23.** *Estimates of the recombination rate (c) in bins of 1 Mb between Asturiana de los Valles -AV- and Morucha -Mo- throughout the autosomal genome.*

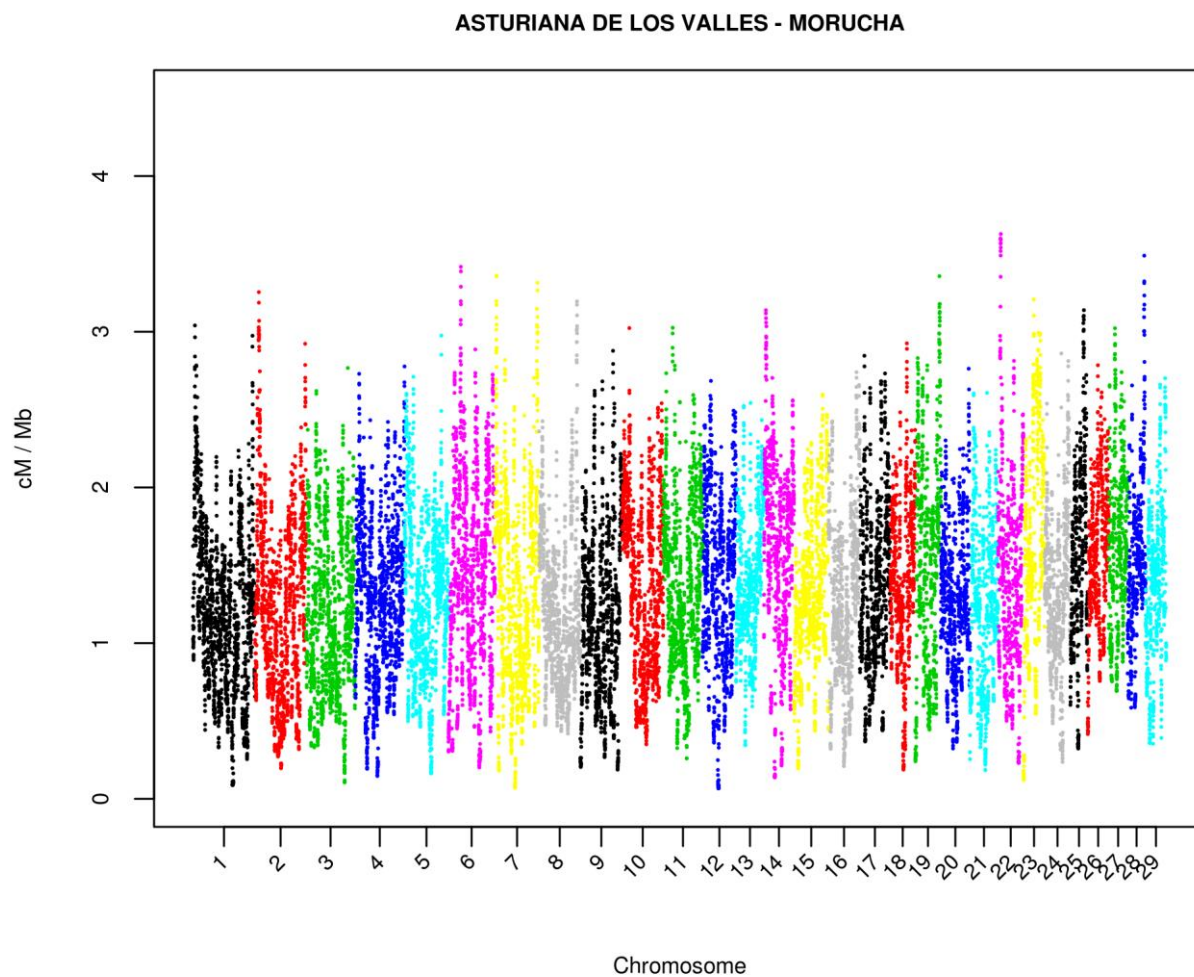

**Supplementary Figure 24.** Estimates of the recombination rate ( $c$ ) in bins of 1 Mb between Asturiana de los Valles -AV- and Pirenaica -Pi- throughout the autosomal genome.

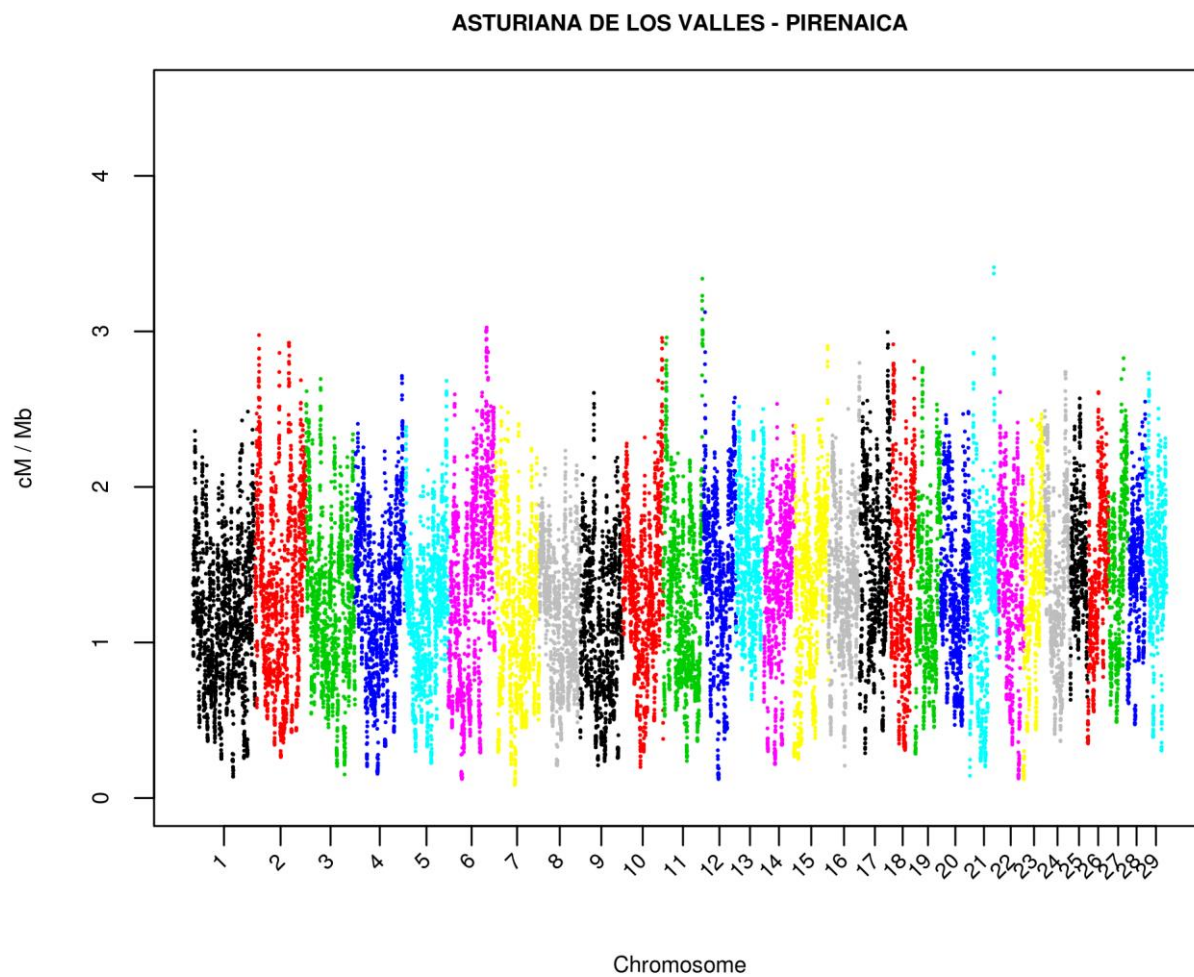

**Supplementary Figure 25.** Estimates of the recombination rate ( $c$ ) in bins of 1 Mb between Asturiana de los Valles -AV- and Retinta -Re- throughout the autosomal genome.

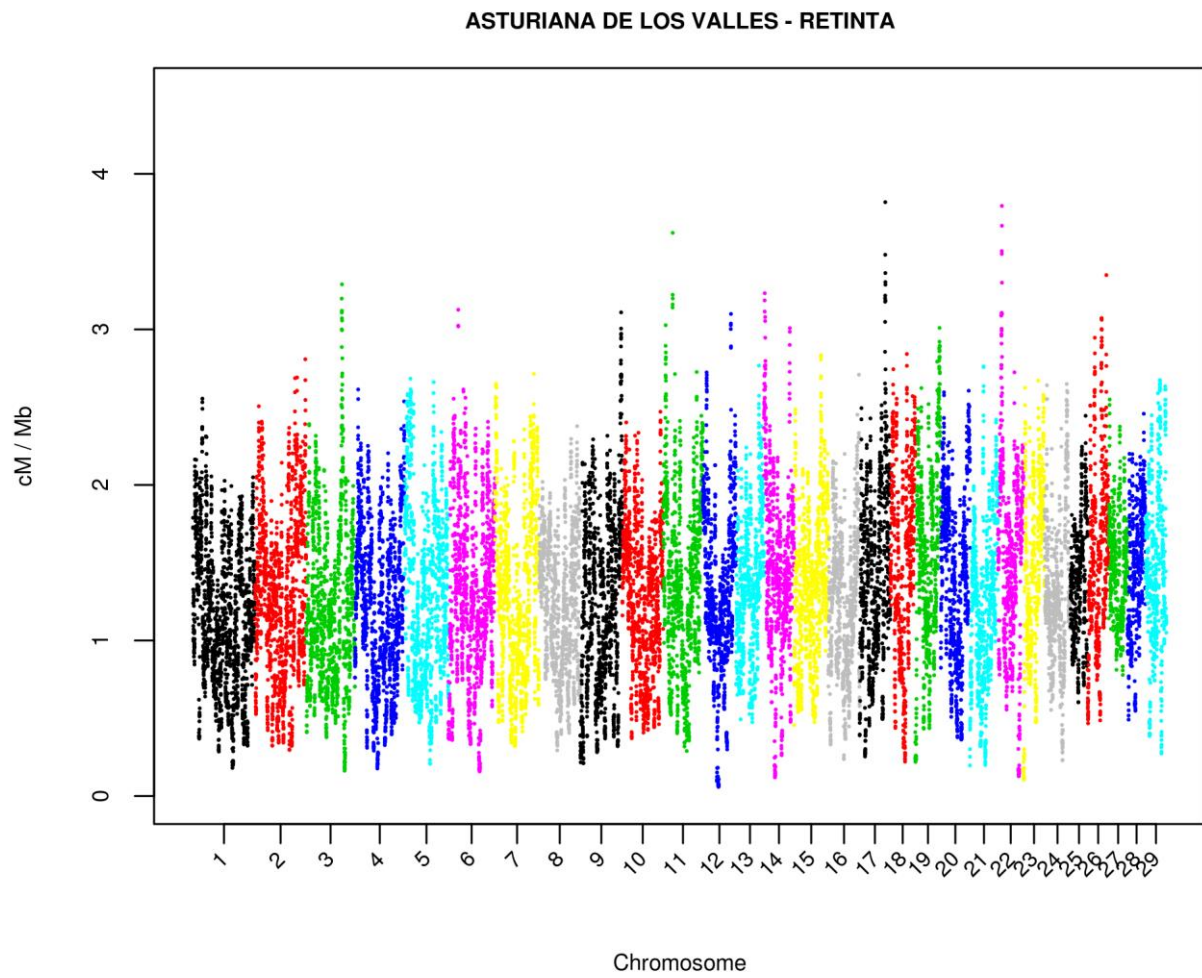

**Supplementary Figure 26.** *Estimates of the recombination rate (c) in bins of 1 Mb between Asturiana de los Valles -AV- and Rubia Gallega –RG- throughout the autosomal genome.*

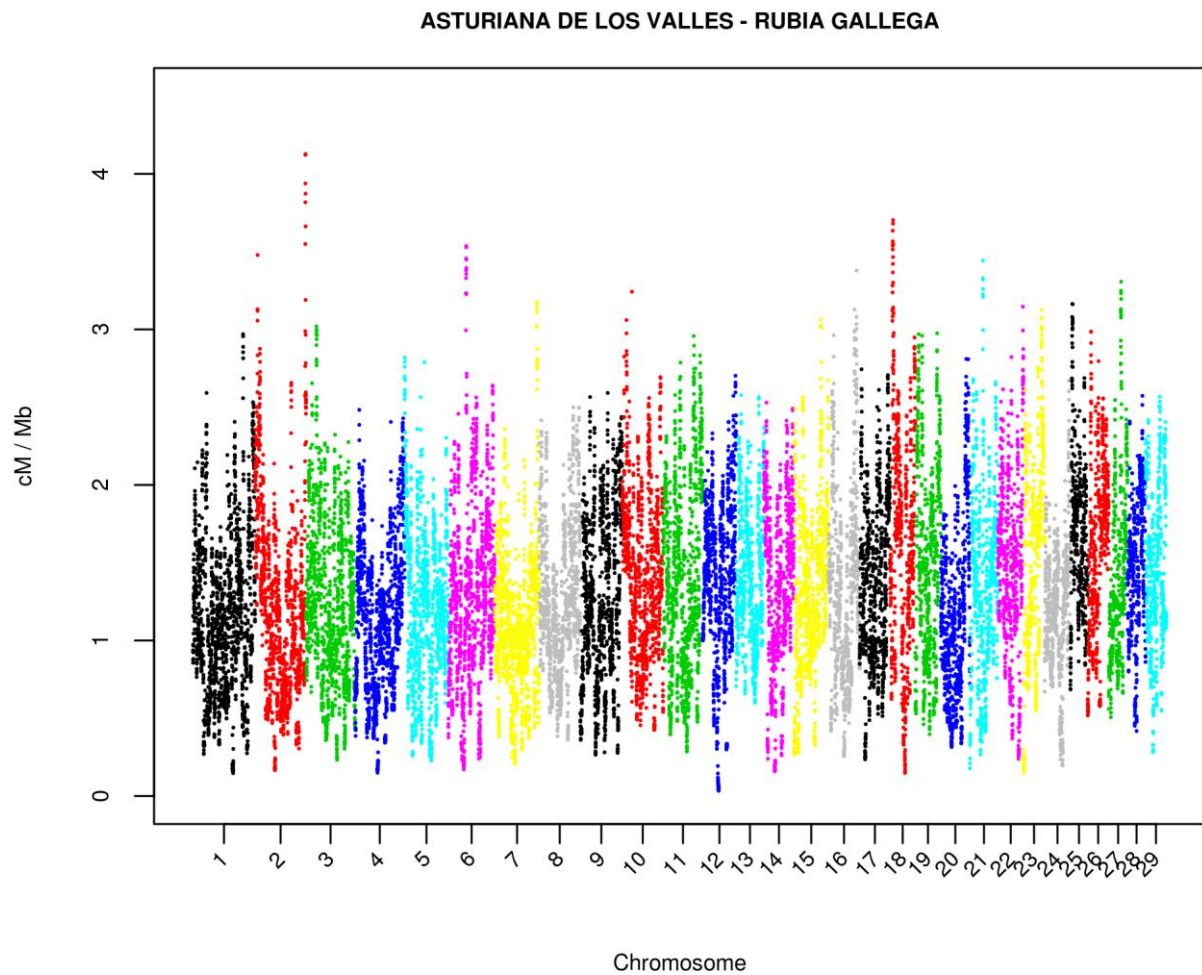

**Supplementary Figure 27.** *Estimates of the recombination rate (c) in bins of 1 Mb between Avileña Negra-Ibérica -ANI- and Bruna dels Pirineus –BP- throughout the autosomal genome.*

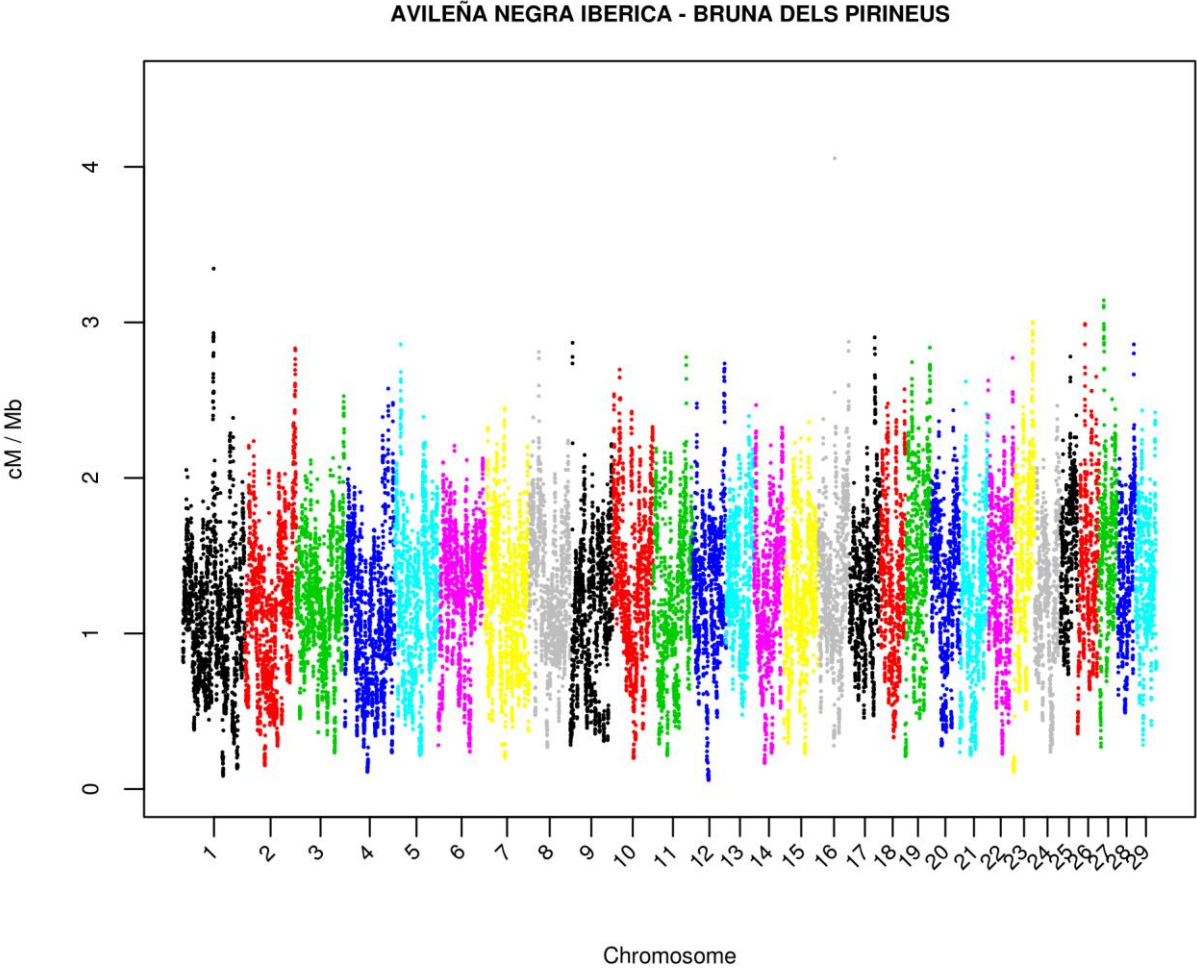

**Supplementary Figure 28.** *Estimates of the recombination rate (c) in bins of 1 Mb between Avileña Negra-Ibérica -ANI- and Morucha – Mo- throughout the autosomal genome.*

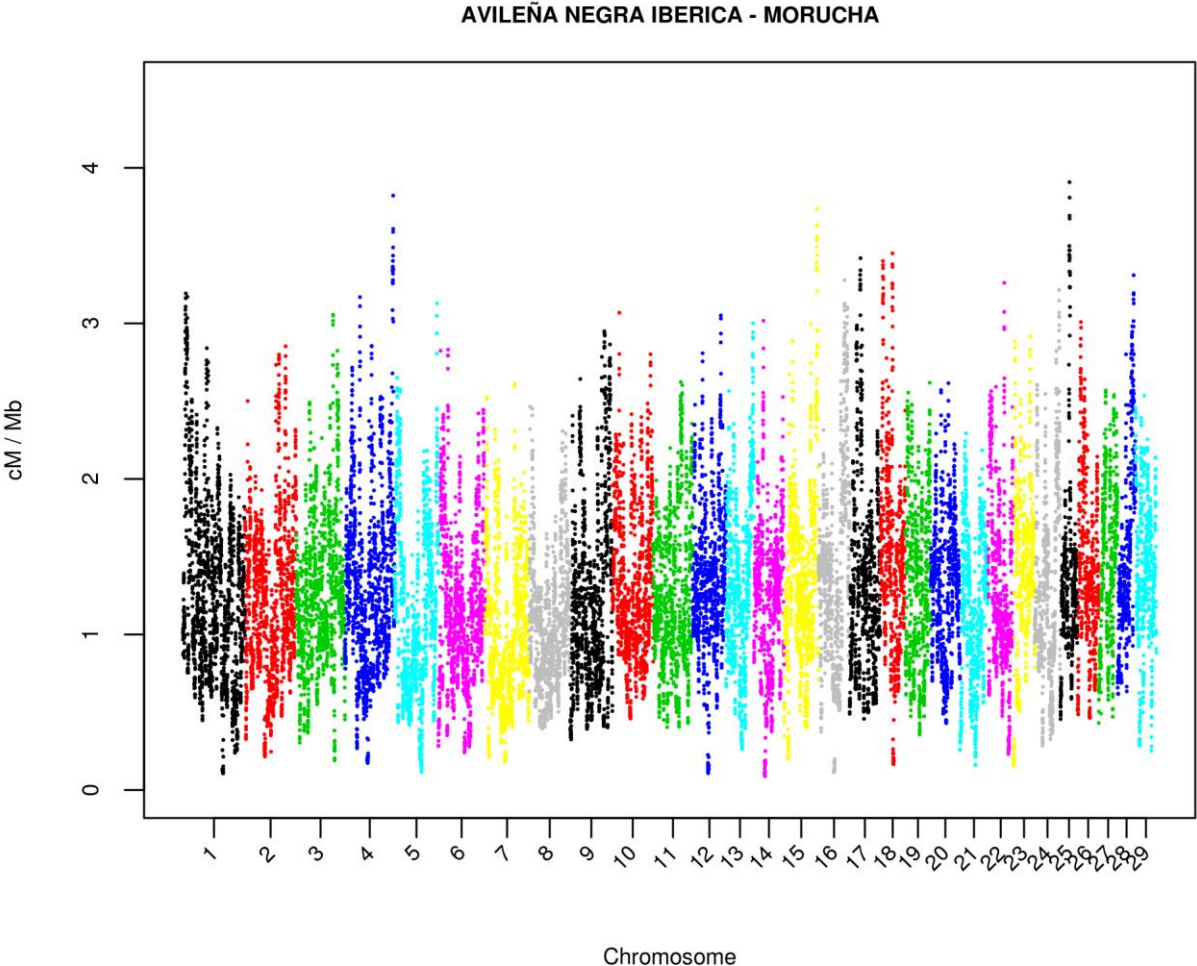

**Supplementary Figure 29.** *Estimates of the recombination rate (c) in bins of 1 Mb between Avileña Negra-Ibérica -ANI- and Pirenaica – Pi- throughout the autosomal genome.*

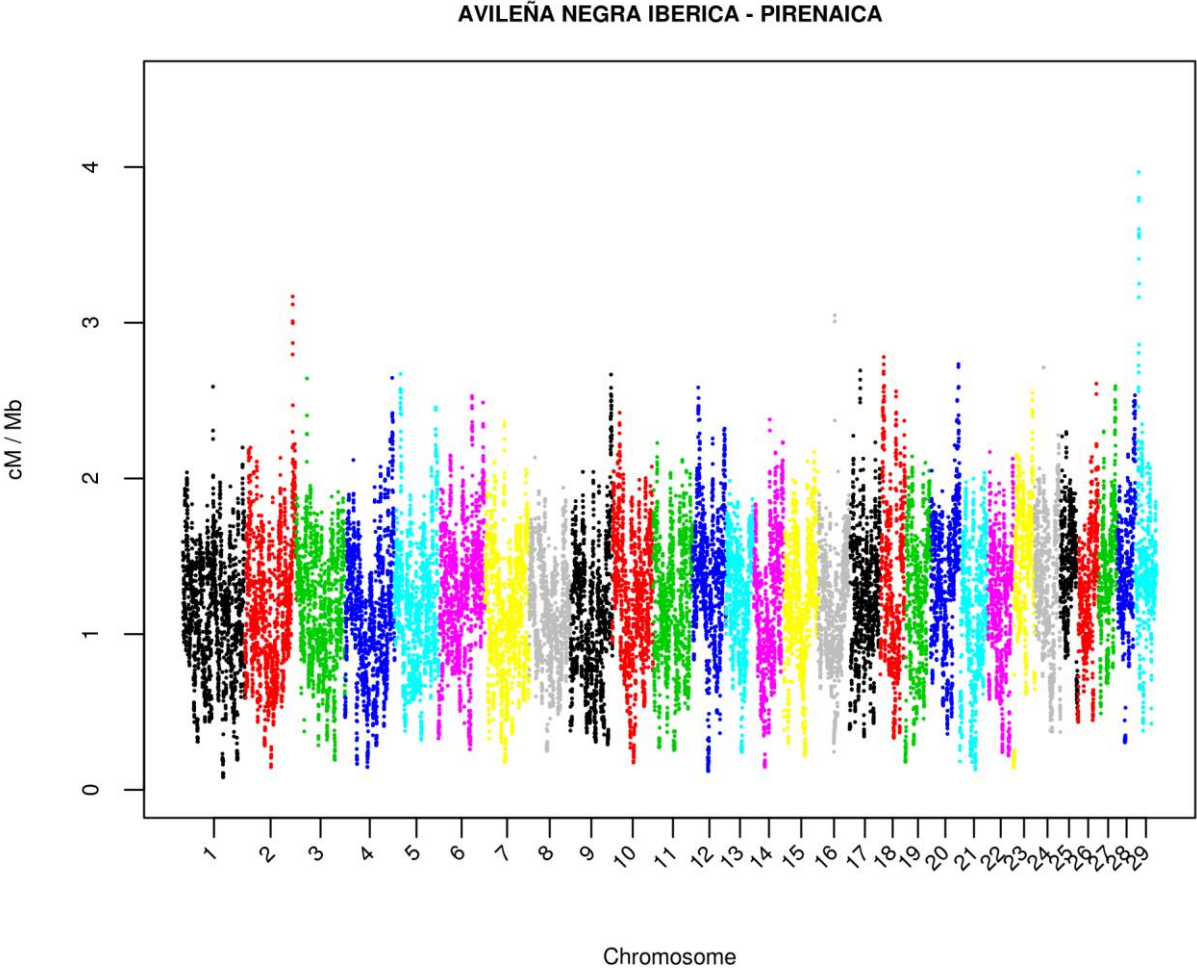



**Supplementary Figure 30.** *Estimates of the recombination rate (c) in bins of 1 Mb between Avileña Negra-Ibérica -ANI- and Retinta – Re- throughout the autosomal genome.*

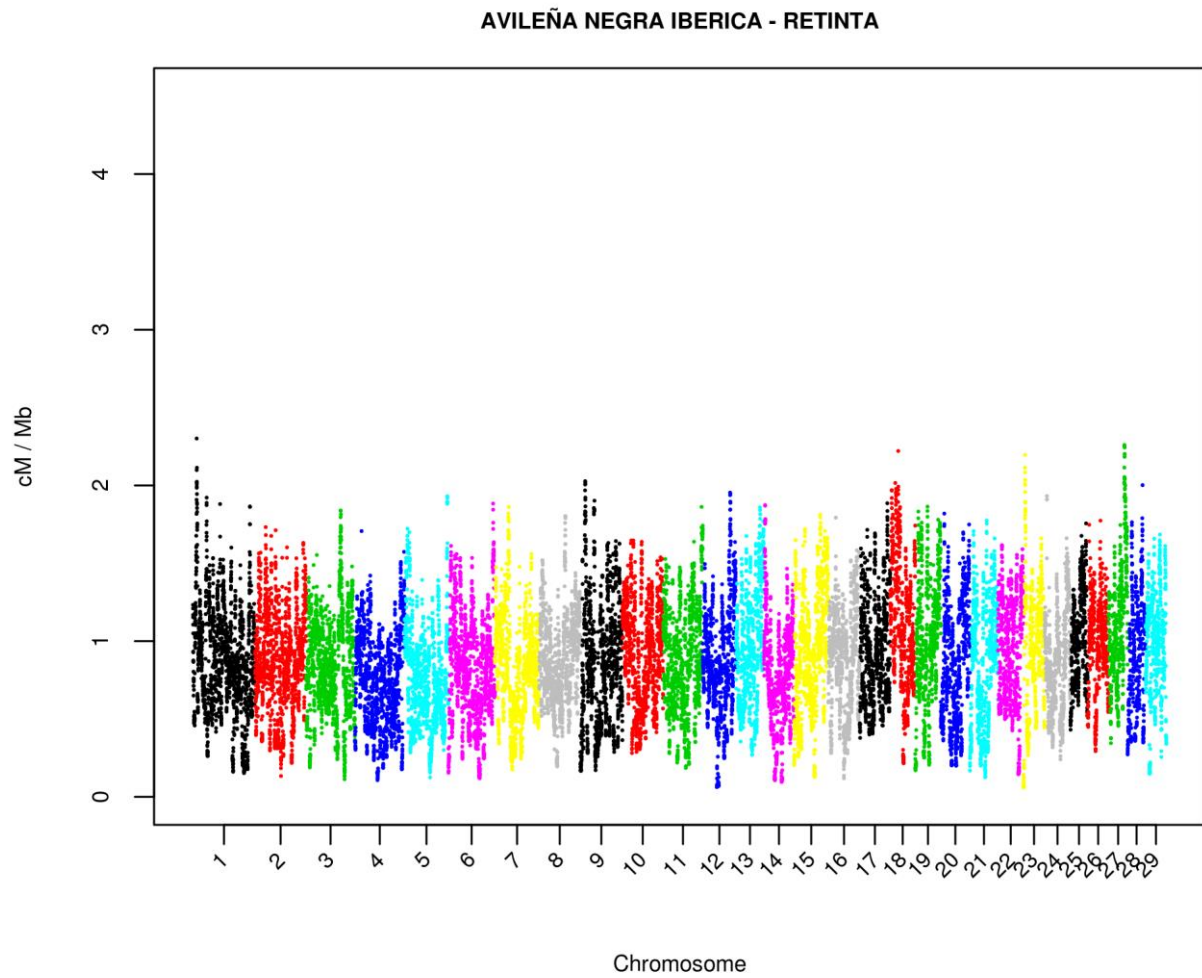

**Supplementary Figure 31.** *Estimates of the recombination rate (c) in bins of 1 Mb between Avileña Negra-Ibérica -ANI- and Rubia Gallega -RG- throughout the autosomal genome.*

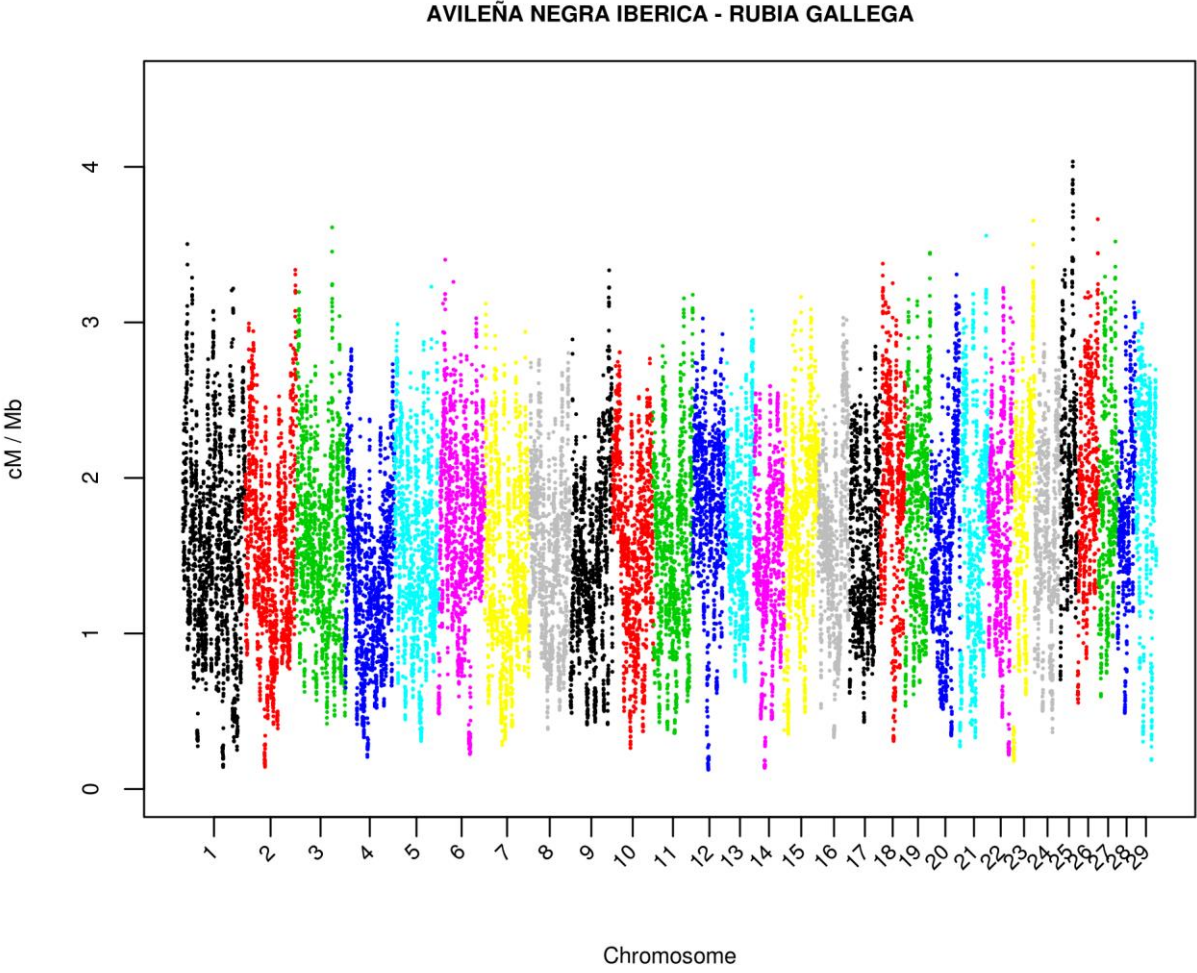

**Supplementary Figure 32.** Estimates of the recombination rate ( $c$ ) in bins of 1 Mb between *Bruna dels Pirineus* -BP- and *Morucha* -Mo- throughout the autosomal genome.

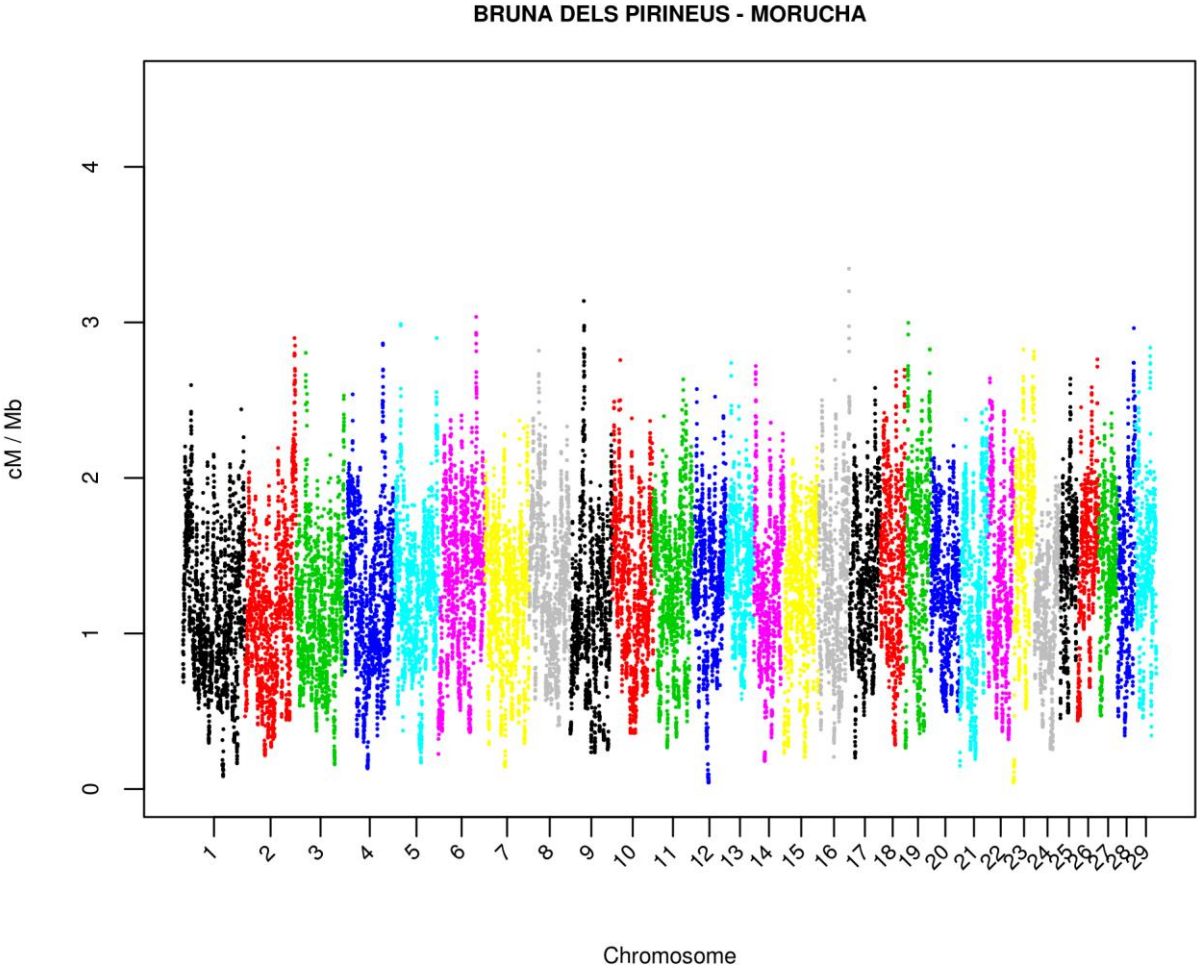

**Supplementary Figure 33.** Estimates of the recombination rate ( $c$ ) in bins of 1 Mb between *Bruna dels Pirineus* -BP- and *Pirenaica* -Pi- throughout the autosomal genome.

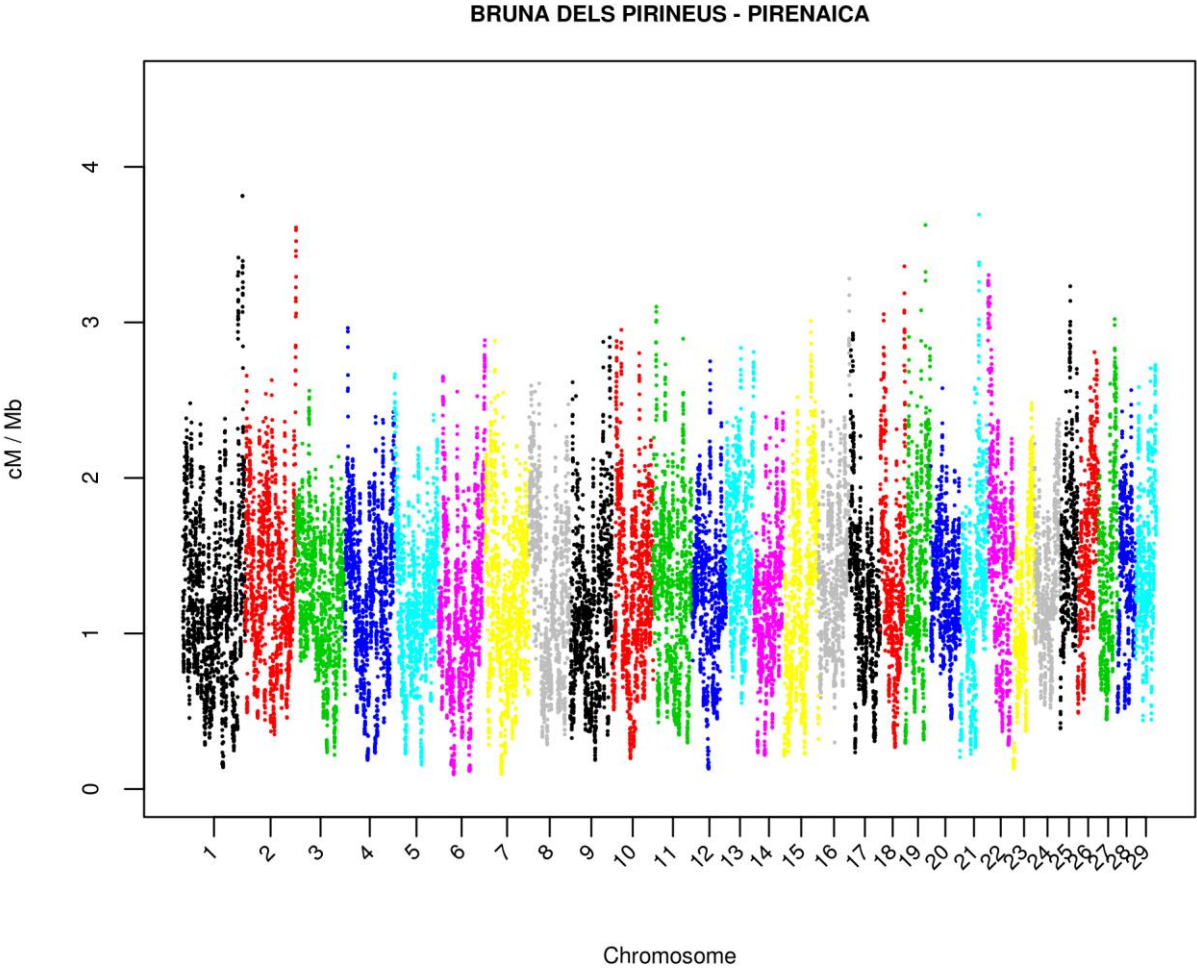

**Supplementary Figure 34.** Estimates of the recombination rate ( $c$ ) in bins of 1 Mb between *Bruna dels Pirineus* -BP- and *Retinta* -Re- throughout the autosomal genome.

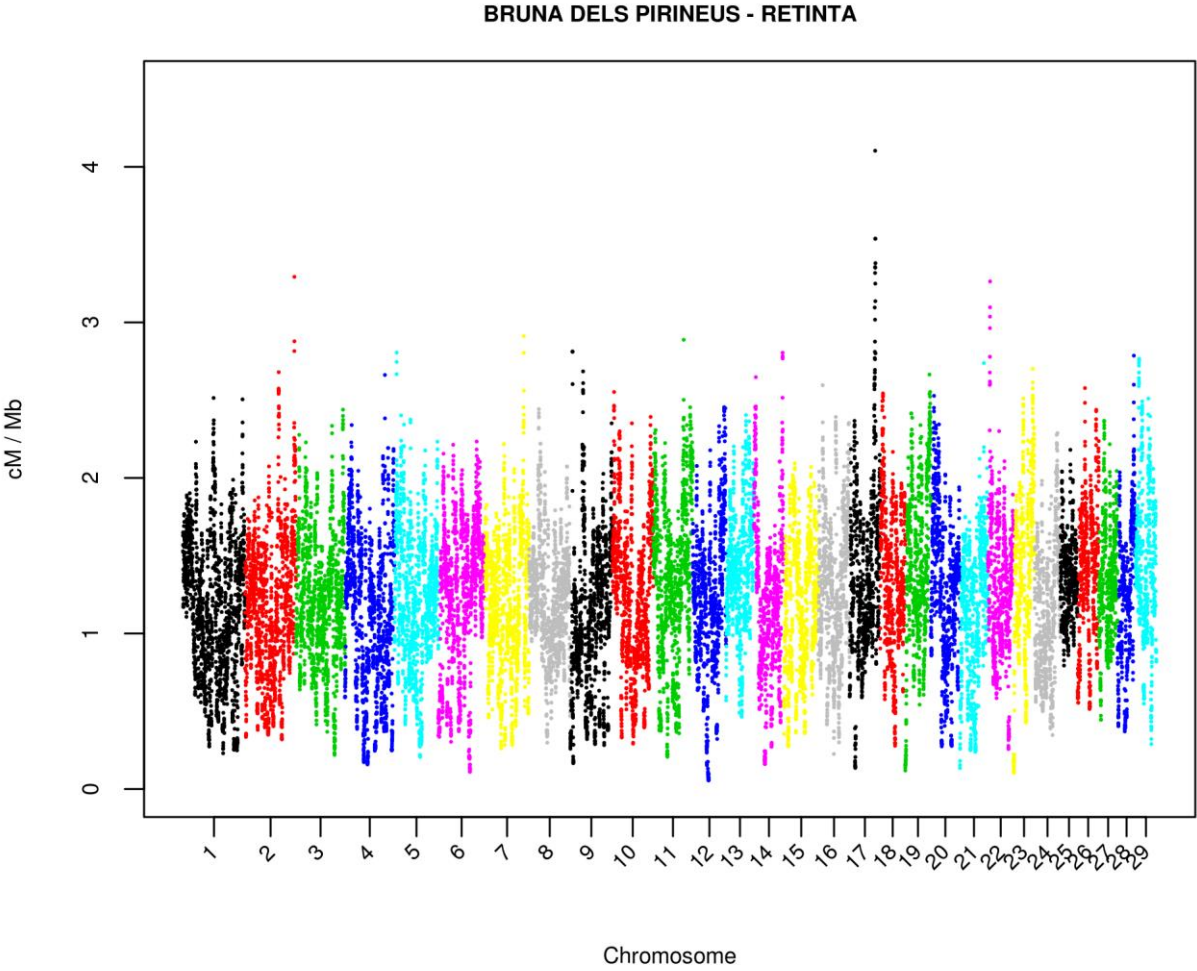

**Supplementary Figure 35.** Estimates of the recombination rate ( $c$ ) in bins of 1 Mb between *Bruna dels Pirineus* -BP- and *Rubia Gallega* -RG- throughout the autosomal genome.

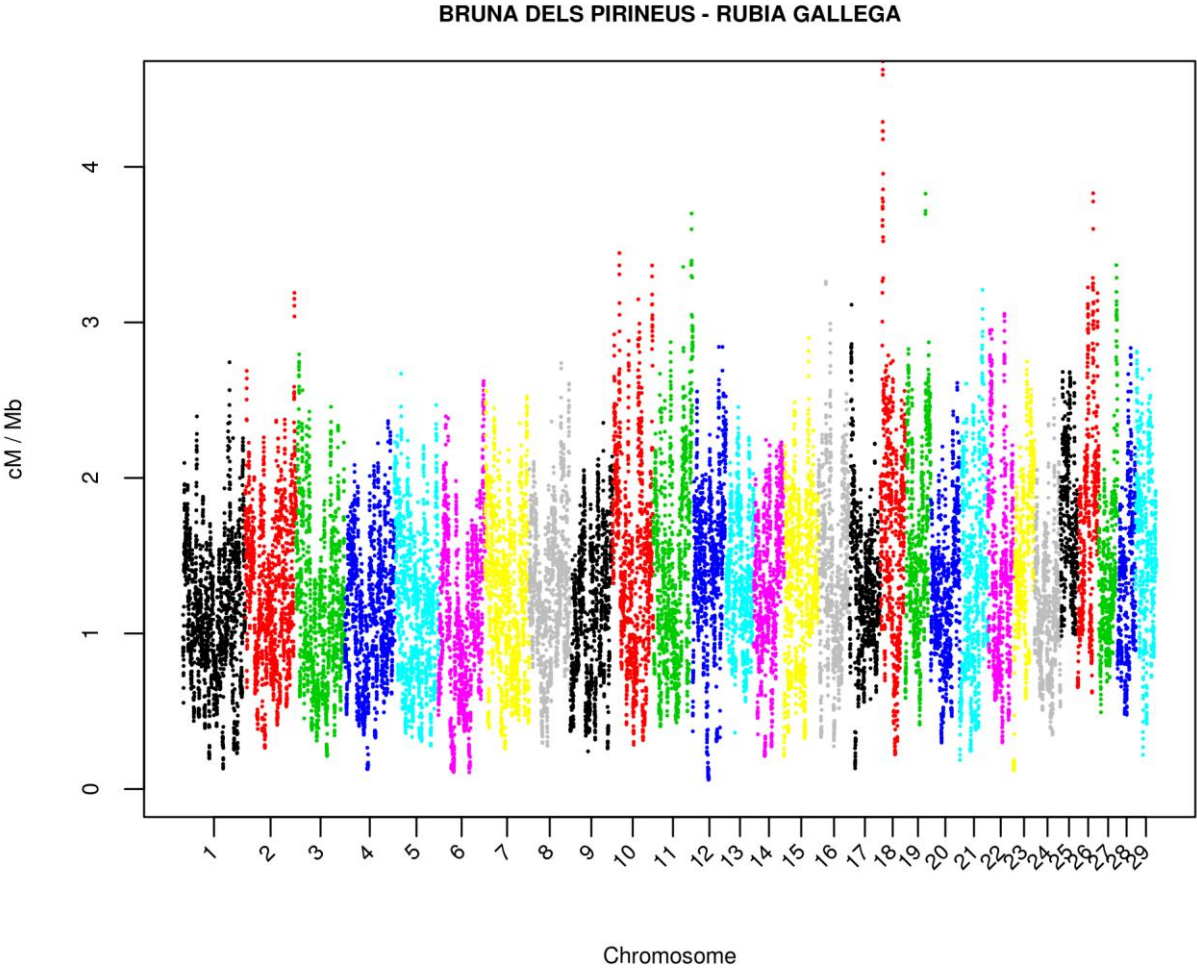

**Supplementary Figure 36.** Estimates of the recombination rate ( $c$ ) in bins of 1 Mb between *Morucha* -*Mo*- and *Pirenaica* -*Pi*- throughout the autosomal genome.

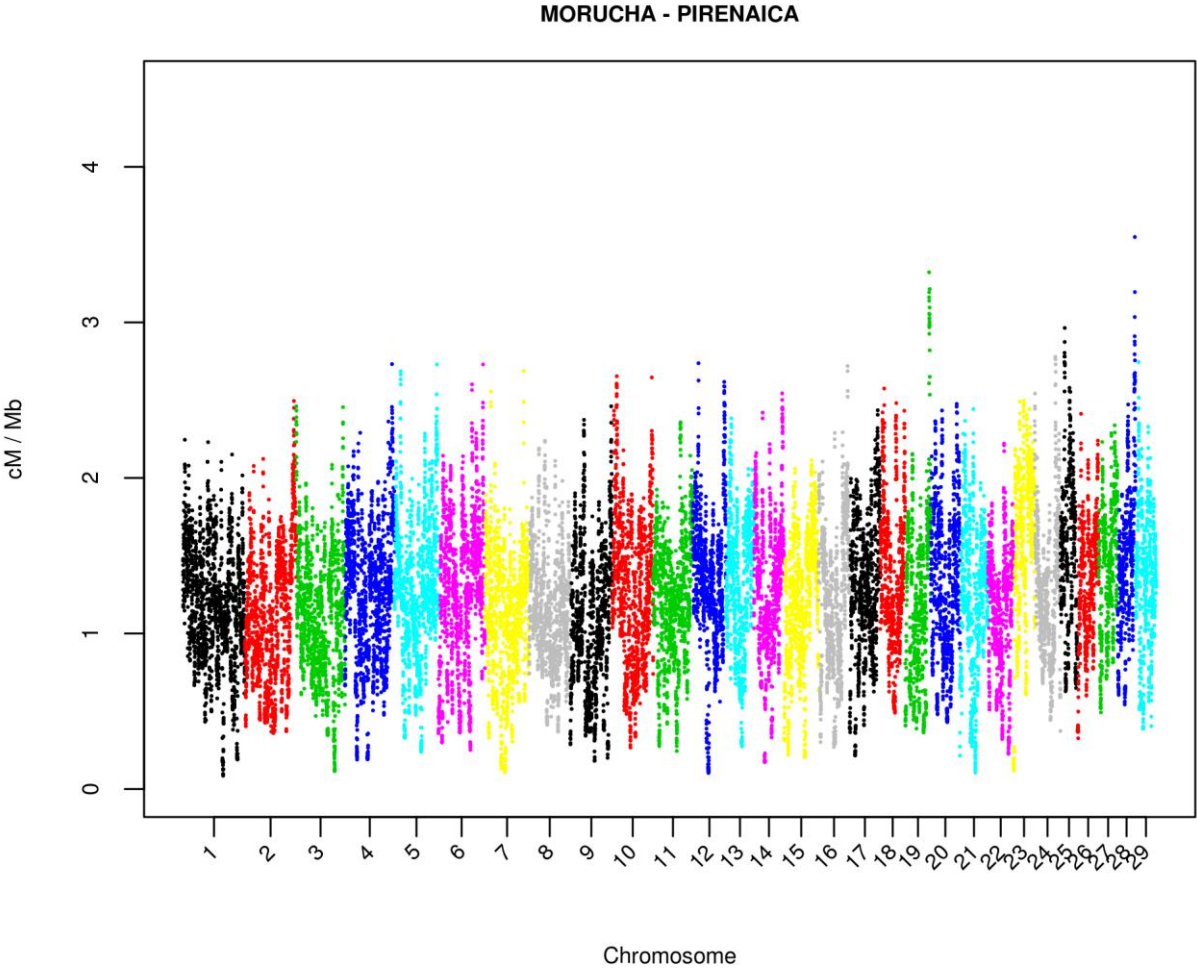

**Supplementary Figure 37.** Estimates of the recombination rate ( $c$ ) in bins of 1 Mb between *Morucha* -*Mo*- and *Retinta* -*Re*- throughout the autosomal genome.

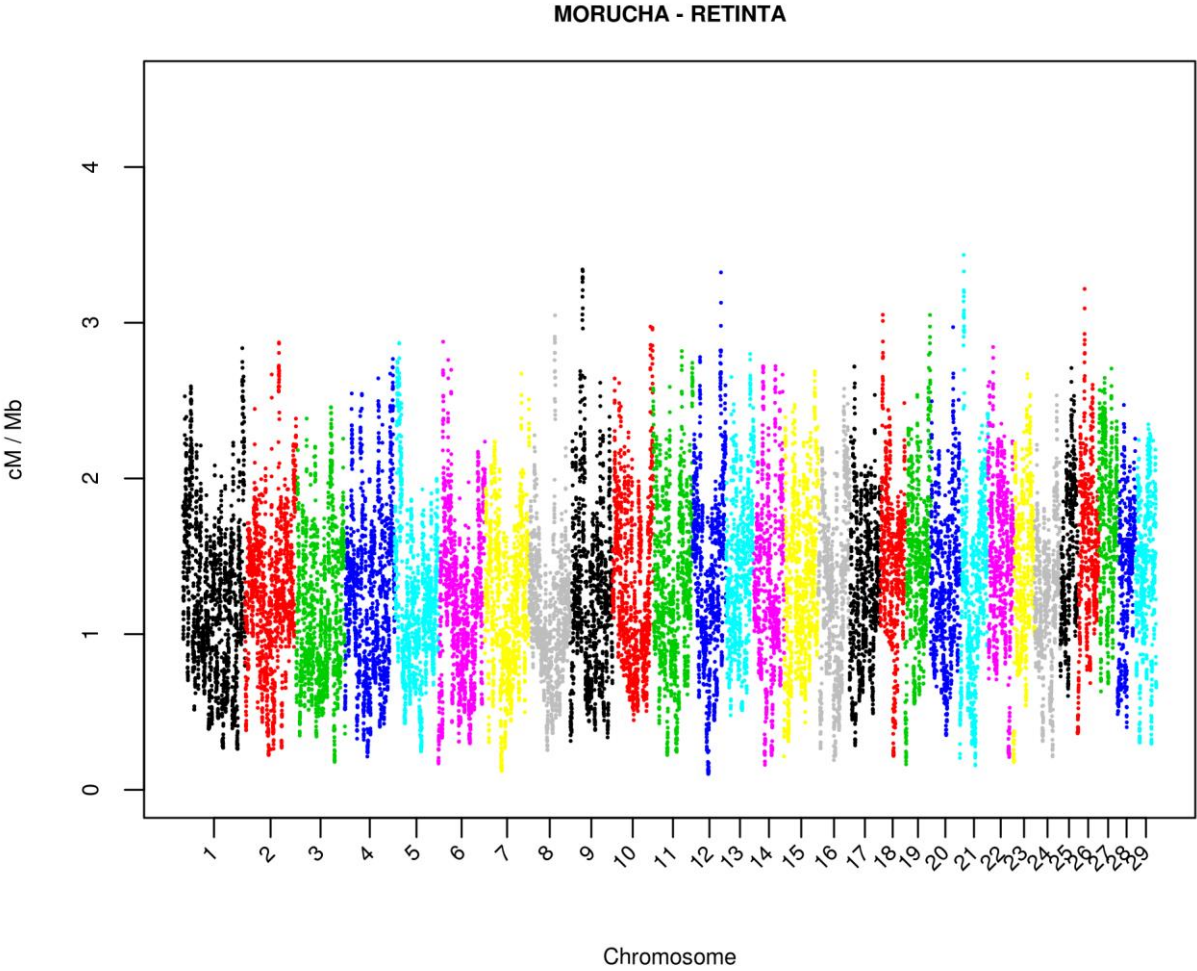



**Supplementary Figure 38.** *Estimates of the recombination rate (c) in bins of 1 Mb between Morucha -Mo- and Rubia Gallega -RG- throughout the autosomal genome.*

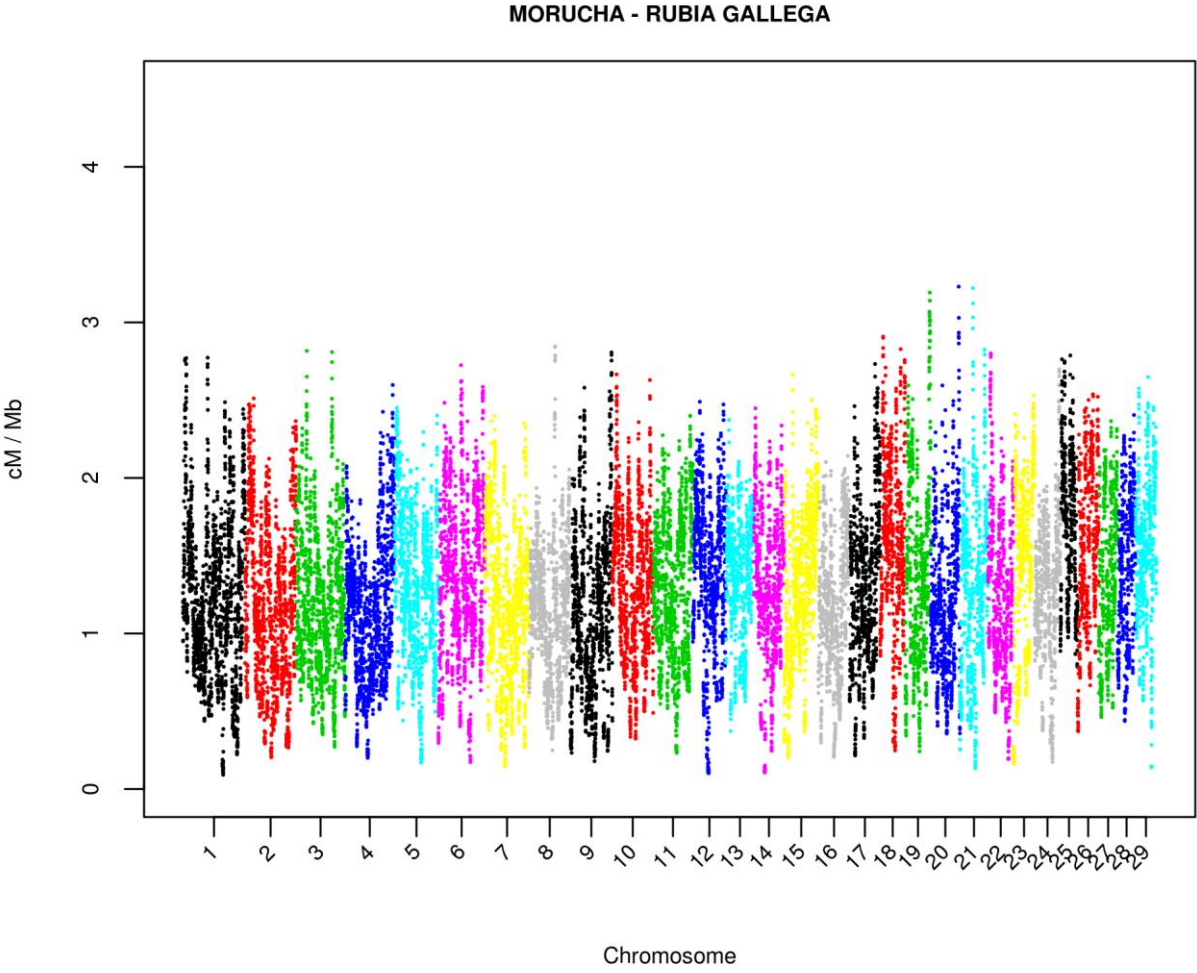

**Supplementary Figure 39.** Estimates of the recombination rate ( $c$ ) in bins of 1 Mb between *Pirenaica -Pi-* and *Retinta -Re-* throughout the autosomal genome.

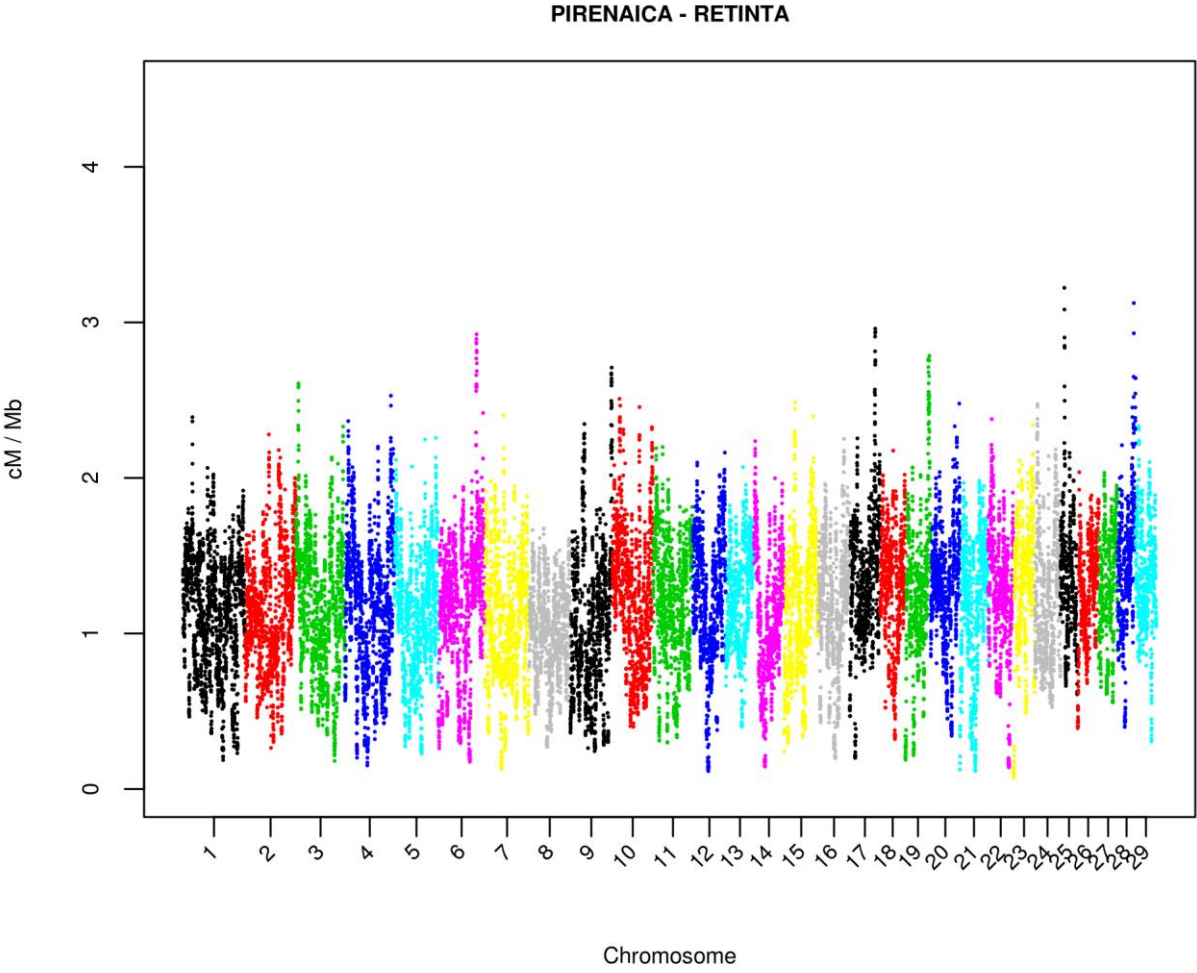

**Supplementary Figure 40.** *Estimates of the recombination rate (c) in bins of 1 Mb between Pirenaica -Pi- and Rubia Gallega -RG- throughout the autosomal genome.*

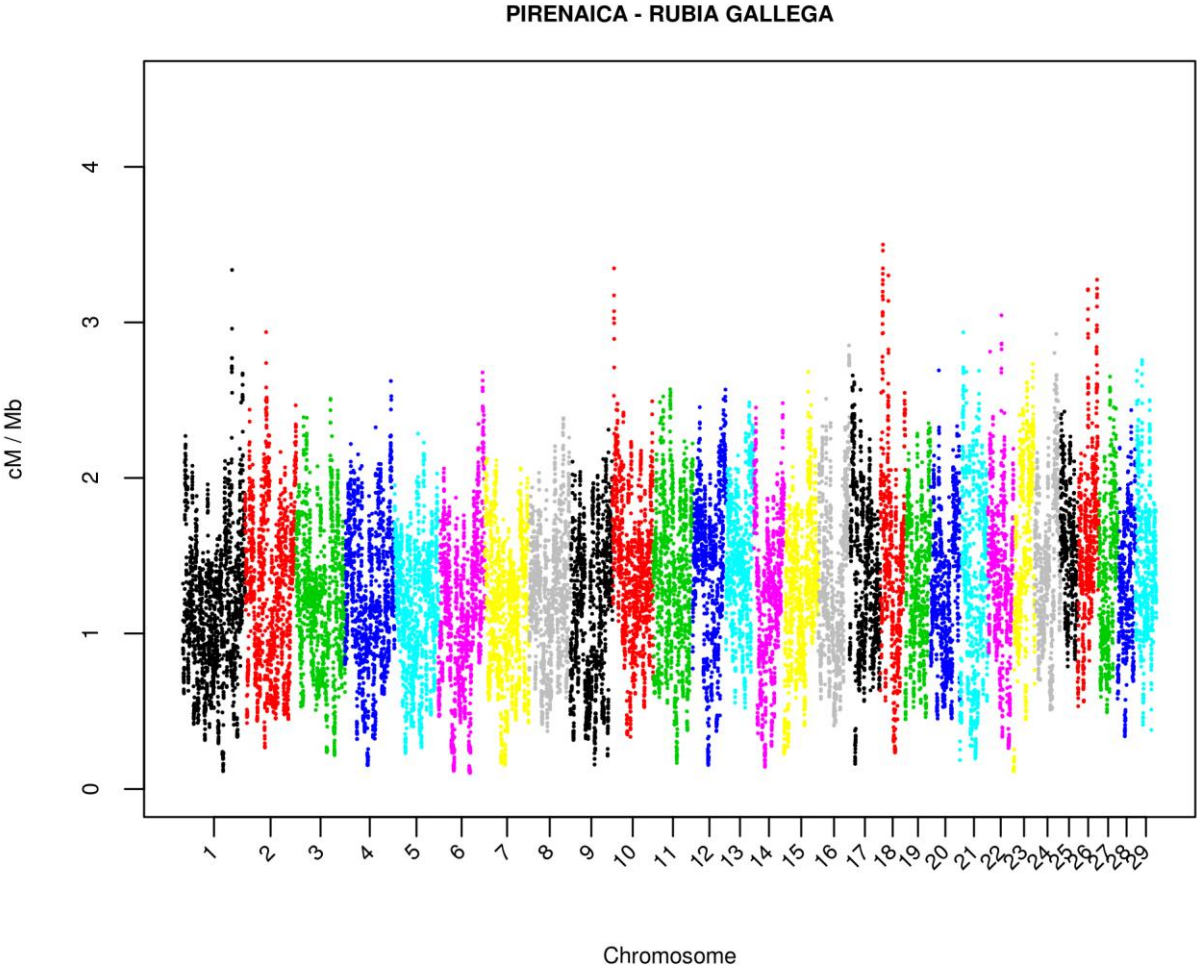

**Supplementary Figure 41.** *Estimates of the recombination rate (c) in bins of 1 Mb between Retinta -Re- and Rubia Gallega -RG- throughout the autosomal genome.*

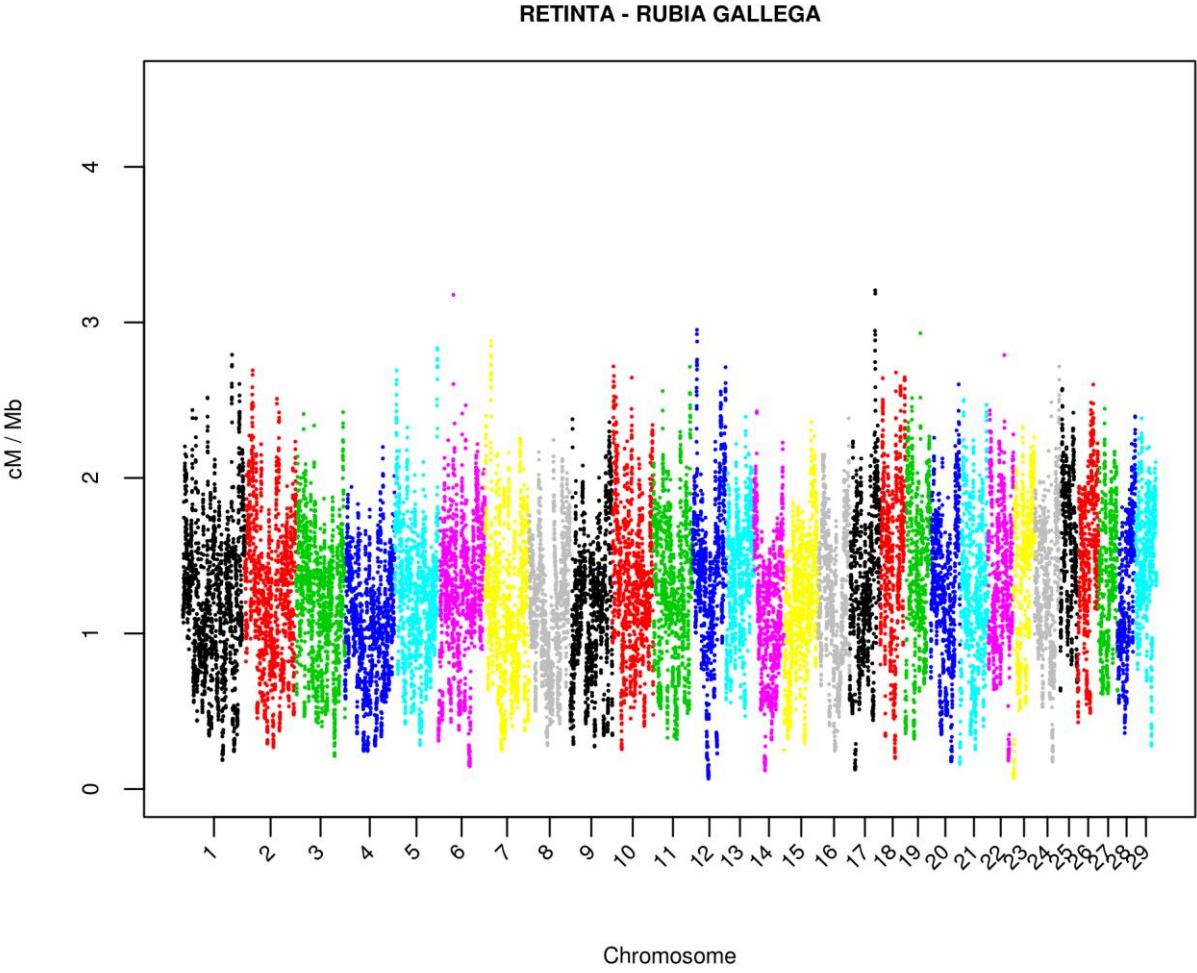

Supplement: DataSheet_1.pdf [file DataSheet_1.pdf]
